1 **Alpha power and stimulus-evoked activity dissociate metacognitive reports of**  
2 **attention, visibility and confidence in a visual detection task**

3 Matthew J Davidson<sup>1,2\*</sup>, James S.P. Macdonald<sup>3</sup> & Nicholas Yeung<sup>1</sup>

4

5

6 <sup>1</sup> Department of Experimental Psychology, University of Oxford, United Kingdom

7 <sup>2</sup> School of Psychology, University of Sydney, Australia

8 <sup>3</sup> Department of Health and Social Sciences, University of West England Bristol, United Kingdom

9 \* Corresponding author, [matthew.davidson@psy.ox.ac.uk](mailto:matthew.davidson@psy.ox.ac.uk)

10 **Abstract:**

11

12 Variability in the detection and discrimination of weak visual stimuli has been linked to  
13 prestimulus neural activity. In particular, the power of oscillatory activity in the alpha-band (8-  
14 12 Hz) has been shown to impact upon the objective likelihood of stimulus detection, as well  
15 as measures of subjective visibility, attention, and decision confidence. We aimed to clarify  
16 how prestimulus alpha influences performance and phenomenology, by recording  
17 simultaneous subjective measures of attention and confidence (Experiment 1), or attention  
18 and visibility (Experiment 2) on a trial-by-trial basis in a visual detection task. Across both  
19 experiments, prestimulus alpha power was negatively and linearly correlated with the  
20 intensity of subjective attention. In contrast to this linear relationship, we observed a  
21 quadratic relationship between the strength of prestimulus alpha power and subjective  
22 ratings of confidence and visibility. We find that this same quadratic relationship links  
23 prestimulus alpha power to the strength of stimulus evoked responses. Visibility and  
24 confidence judgements corresponded to the strength of evoked responses, but confidence,  
25 uniquely, incorporated information about attentional state. As such, our findings reveal  
26 distinct psychological and neural correlates of metacognitive judgements of attentional state,  
27 stimulus visibility, and decision confidence.

28

## 29 Introduction

30  
31

32 This study explores the relationship between EEG alpha oscillations, objective  
33 performance, and subjective reports of visibility, attention, and confidence in a visual  
34 detection task, with two aims. The first is to characterise the relationship between alpha  
35 activity and objectively measured vs. subjectively experienced aspects of visual processing.  
36 Alpha (8-12 Hz) oscillations are prominent in spontaneous neural recordings, being readily  
37 observable to the naked eye (Berger, 1929). Rather than reflecting a passively idling state  
38 (Pfurtscheller et al., 1996), these oscillations are now recognised to account for a substantial  
39 portion of the behavioural variability that is recorded during psychophysical tasks (Ress et  
40 al., 2000). Recent M/EEG studies have shown that the power (Babiloni et al., 2006; Benwell  
41 et al., 2017; Ergenoglu et al., 2004; lemi et al., 2017; lemi & Busch, 2018; Limbach &  
42 Corballis, 2016) and phase (Busch et al., 2009; Coon et al., 2016; Mathewson et al., 2009;  
43 VanRullen et al., 2011) of prestimulus activity can determine perceptual outcomes. These  
44 results hint at the possibility of predicting perception and behaviour based on earlier neural  
45 states, although at present, the effects of alpha dynamics on objective and subjective  
46 measures of performance have been mixed. Here we aim to clarify how prestimulus alpha  
47 power influences performance and subjective reports, and how the generation of sensory  
48 evoked potentials may mediate these introspective reports (Chaumon & Busch, 2014;  
49 Hanslmayr et al., 2007; lemi et al., 2019; Min et al., 2007).

50 Our second, complementary aim is to use these neural markers—prestimulus alpha  
51 and evoked potentials—to characterise the information that underpins subjective reports of  
52 attention and confidence. There is growing interest in the mechanisms and functional role of  
53 metacognitive processes that monitor and regulate ongoing processing (Fleming & Frith,  
54 2014). Much of this work has focused on decision confidence—a subjective evaluation of the  
55 likelihood that a judgement reached is correct (Kepecs & Mainen, 2012; Yeung &  
56 Summerfield, 2012). According to influential theories, confidence reflects a readout of the  
57 strength of evidence in favour of the chosen option (Kepecs & Mainen, 2012; Pleskac &  
58 Busemeyer, 2010; Vickers & Packer, 1982). However, confidence is additionally sensitive to  
59 features such as the perceived reliability of evidence (Boldt et al., 2017), speed of decision  
60 (Kiani et al., 2014), and even social context (Bang et al., 2017), suggesting that evidence  
61 strength is combined with relevant contextual information in generating confidence reports  
62 (Shekhar & Rahnev, 2018). In parallel with this work on confidence, a separate body of  
63 research has investigated people’s introspective insight into their degree of attentional focus.  
64 Introspective reports of attentional state are predictive of objective performance across a  
65 range of tasks (Smallwood & Schooler, 2015), and correlate with neural markers including  
66 prestimulus alpha (Macdonald et al., 2011; Whitmarsh et al., 2014, 2017, 2021; Worden et  
67 al., 2000) and stimulus-related potentials (Barron et al., 2011). Although some studies have  
68 begun to explore the relationship between attention and confidence (Denison et al., 2018;  
69 Kurtz et al., 2017; Rahnev et al., 2011; Recht et al., 2019, 2021; Zizlsperger et al., 2012),  
70 substantive questions remain, in particular regarding whether confidence reports incorporate  
71 contextual information about participants’ attentional state, and the degree to which  
72 subjective reports of confidence and attention depend on similar vs. distinct sources of  
73 information. We address these questions here.

74

75           Alpha oscillations provide an exciting opportunity to investigate relationships between  
76 attention, sensory processing and introspective reports. Recent studies suggest that alpha  
77 activity prior to the onset of a stimulus may govern objective performance criteria, albeit with  
78 somewhat inconsistent results. For example, higher prestimulus alpha power has been  
79 shown to either increase (Babiloni et al., 2006; Becker et al., 2011; Linkenkaer-Hansen et  
80 al., 2004), or decrease objective behavioural performance (Ergenoglu et al., 2004; Iemi et  
81 al., 2017; van Dijk et al., 2008), across a wide range of task contexts (Clayton et al., 2018;  
82 Iemi et al., 2017; Van Diepen et al., 2019). Similarly, visual detection has been shown to  
83 depend on when stimuli are presented relative to the phase of prestimulus alpha oscillations  
84 (Busch et al., 2009; Mathewson et al., 2009; VanRullen et al., 2011), perhaps dependent on  
85 the state of attentional focus (Kizuk & Mathewson, 2017; Mathewson et al., 2009). One  
86 partial account for these discrepancies, and a convergent theme within this literature, is that  
87 alpha oscillations reflect a state of relative cortical excitation or inhibition, which is mediated  
88 under top-down control to facilitate sensory processing (Van Diepen et al., 2019). In this  
89 context, lower prestimulus alpha power is indicative of a more highly excitable cortical state  
90 (W. Klimesch et al., 2007; Romei et al., 2008), which supports the negative relationship that  
91 has been reported between alpha power and detection performance (Ergenoglu et al., 2004;  
92 Hanslmayr et al., 2005; van Dijk et al., 2008). Consistent with this view, prestimulus alpha  
93 power is sensitive to attention, decreasing over cortical sites when attending to task-relevant  
94 information (Gould et al., 2011; Peylo et al., 2021; Sauseng et al., 2005; Thut et al., 2006).

95           More recently, however, evidence has linked alpha oscillations to the subjective  
96 aspects of visual decisions, which may bias behavioural performance in lieu of any change  
97 in sensory precision (Benwell et al., 2017; Limbach & Corballis, 2016; Samaha, LaRocque,  
98 et al., 2020). In particular, low prestimulus alpha power has been shown to precede a higher  
99 incidence of target detection and false-alarms (Iemi et al., 2017; Limbach & Corballis, 2016;  
100 Samaha et al., 2020) suggesting that low alpha power may improve detection performance  
101 only indirectly, by biasing participants to report 'yes' in a detection task regardless of the  
102 veridical presence of a target stimulus. In support of this view, in two recent examples, alpha  
103 power preceding a two alternative forced choice (2AFC) discrimination task was shown to  
104 negatively correlate with decision confidence (Samaha et al., 2017), and perceptual  
105 awareness/target visibility (Benwell et al., 2017) without any change in objective accuracy.

106  
107           Variations in alpha power have thus been associated with changes in objectively  
108 measured and subjectively reported indices of sensory processes and attention. To  
109 decouple the influence of alpha power on these overlapping indices, we analysed data from  
110 two EEG experiments involving a near-threshold target detection task, in which we collected  
111 simultaneous ratings of both decision confidence and attention (Experiment 1), and target  
112 visibility and attention (Experiment 2) on a trial-by-trial basis. Our analysis focused on how  
113 alpha power impacts upon these outcomes during target detection. For both experiments we  
114 used an identical stimulus detection task involving decisions about stimulus  
115 presence/absence - decisions that have distinct neural contributions (Mazor et al., 2020),  
116 and metacognitive correlates (Kanai et al., 2010; Meuwese et al., 2014) compared to their  
117 2AFC counterparts. Combined, the results of the two experiments allow us to assess how  
118 prestimulus alpha activity influences sensory processing and introspective reports.  
119 Contrasted, the results of the two experiments provide insights into the contribution of  
120 attention and sensory evidence to judgements of confidence (Experiment 1) and stimulus  
121 visibility (Experiment 2).

122 To preview our results, we show that participants' confidence reports (but not their  
123 ratings of stimulus visibility) correlate with their self-reported attentional state, suggesting a  
124 partial dependence of the two key forms of introspective report. This correlation  
125 notwithstanding, our EEG analyses indicate that evaluations of confidence and attention  
126 depend on partially distinct sources of information: We demonstrate that a quadratic,  
127 inverted-U function links prestimulus alpha power to subjective visibility and confidence in a  
128 detection task, whereas attention negatively and linearly correlated with alpha power. We  
129 further show that both confidence and visibility increase with the amplitude of visually evoked  
130 potentials, which were also quadratically modulated by prestimulus alpha power.  
131

## 132 **Materials and Methods**

133

### 134 **Participants**

135 A total of 21 participants participated in this research, 12 participants in Experiment  
136 1, and 9 in Experiment 2. A portion of the data from Experiment 1 has previously been  
137 published (Macdonald et al., 2011). That work showed that single-trial ratings of subjective  
138 attention could be classified based on prestimulus alpha power, and that this classification  
139 was optimal over a sliding-window of several minutes (MacDonald et al., 2011). Here, we  
140 focus instead on how prestimulus alpha power (and, in Supplemental analyses, the phase of  
141 this activity) affect the generation of target-evoked event related-potentials (ERPs), and the  
142 interaction of prestimulus alpha and ERPs on subjective criteria. Experiment 2 is a new  
143 experiment. There were five males in Experiment 1, and all participants' ages ranged from  
144 18-29 years ( $M = 22.3$ ,  $SD = 4.4$ ). There were 4 males in Experiment 2, and all participants'  
145 ages ranged from 19-23 years ( $M = 20.6$ ,  $SD = 1.8$ ). All participants were recruited for  
146 participation at the University of Oxford, were paid for their participation, and had normal or  
147 corrected to normal vision. This research was conducted in accordance with the University of  
148 Oxford's institutional review board, and the American Psychological Association's standards  
149 for ethical treatment of participants.  
150

### 151 **Experimental procedure**

152 The experimental procedure was very similar between the two experiments, and has  
153 previously been detailed in Macdonald et al., (2011). In each trial, participants were asked to  
154 monitor a rapid serial visual presentation (RSVP) of images for a difficult-to-detect target  
155 image. Each trial began with the words 'Get Ready' presented on screen for 300 ms, before  
156 the 10 images comprising the RSVP stream were presented after a further 700 ms. Each  
157 image in the stream was presented for 50 ms, followed by a blank interval for 50 ms,  
158 resulting in a 10 Hz presentation rate. Each image was a grey-scale pattern of white noise,  
159 and target images included a set of six superimposed concentric circles (each subtending  
160  $0.4^\circ$  visual angle), arranged in a hexagonal pattern (subtending  $3.3^\circ$  visual angle; **Figure 1**).  
161 There were 936 trials in total. Targets were presented on 50% of trials, with their position in  
162 the RSVP stream balanced across image positions 3-8. For each participant, the contrast of

163 the hexagonal target pattern was determined in a pre-experimental session to titrate  
164 detection rates to approximately 75% (QUEST, Psychophysics Toolbox 3, Brainard 1997).

165 After the RSVP stream, participants indicated their subjective attention and  
166 confidence (Experiment 1), or attention and visibility (Experiment 2) ratings by providing a  
167 single mouse-click within the response screen (**Figure 1**). In Experiment 1, the response  
168 screen was subdivided into four quadrants by faint grey lines, with the prompts “Did you see  
169 the target?”, “How confident are you of that?” and “How focused were you?” Displayed at the  
170 top of the screen. The words “Sure Absent” and “Sure Present” were presented on the left  
171 and right extrema of the x-axis, and “More Focused” and “Less Focused” placed on the top  
172 and bottom of the y-axis. In Experiment 2, the prompt at the top of the screen replaced the  
173 question about confidence with one targeting stimulus visibility: “How much of the target did  
174 you see?”, with extremes of the x-axis labelled as “None” and “All”. In both experiments, the  
175 response screen was 201 x 201 pixels. Attention was measured on a 201-point scale  
176 according to the y-axis click location. In Experiment 1, confidence in presence or absence  
177 was measured on a 100 point scale (decreasing or increasing distance from the vertical  
178 midline), and in Experiment 2 visibility was measured on a 201-point scale according to the  
179 x-axis click location.

180 Participants were instructed to rate their subjective state only with respect to the  
181 current trial, and to incorporate their attention and confidence/visibility in this single  
182 response. Thus, in Experiment 1, the horizontal distance from the vertical midline represents  
183 confidence in the presence or absence of a target, and in Experiment 2 click distance from  
184 the left extrema represents target visibility. In both experiments, click position on the vertical  
185 axis represents trial-specific attention to the detection task.

186

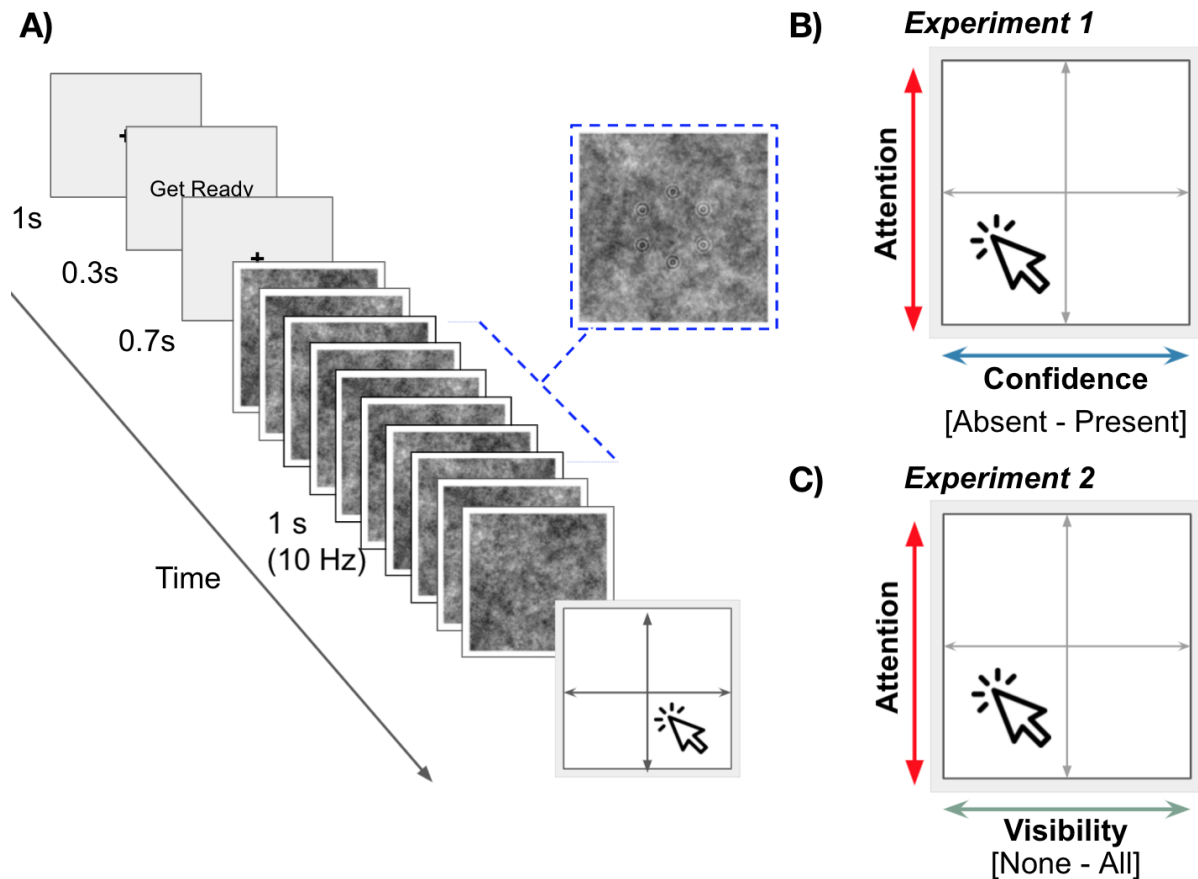

187

188

189

190

191

192

193

194

**Figure 1.** Trial procedure and response options. A) Each trial began with the words ‘Get Ready’ presented on screen. After a fixed interval of 1s, the RSVP sequence began, and a target image was presented once, on 50% of trials. Targets (shown outlined in blue) were presented in one of positions 3 to 8 in the RSVP stream. B) After each trial, participants rated either their subjective confidence and attention (Experiment 1), or C) the perceived visibility of the target and their attention (Experiment 2).

194

## 195 Behavioural analysis

196

197

198

199

200

201

202

203

204

205

206

207

208

209

For our behavioural analysis, we calculated overall target accuracy (% correct), as well as hit rate (HR; “Yes” responses in target-present trials), false alarm rate (FAR; “Yes” responses in target-absent trials), and standard metrics from signal detection theory (Green & Swets, 1966). Hits and false alarms (i.e., trials on which participants’ responses were taken to indicate a target was present rather than absent) were defined in Experiment 1 as clicks in the right half of the response screen, and in Experiment 2 as any click away from the left extrema of this screen. We calculated  $d'$ , which measures the sensitivity between signal and noise distributions in the signal detection framework, as well as decision criterion ( $c$ ), which measures the likelihood of “Yes” responses, regardless of the veridical presence of a stimulus. When  $c$  is positive, the decision criterion is said to be conservative, and negative  $c$  values indicate a more liberal criterion - or tendency to respond ‘yes’ in detection tasks, relative to the true unbiased response probability given by the intersection between signal and noise distributions.

210 We also calculated metacognitive sensitivity (type-2 performance), which captures the  
211 fidelity of introspective judgements with relevance to objective performance. High type-2  
212 performance indicates that introspective judgements are well-calibrated, and positively  
213 correlated with the objective likelihood of a correct response. Low type-2 performance  
214 indicates that introspective judgements are a poor indicator of objective accuracy. We  
215 quantified type-2 performance as the area under the ROC curve (AUROC2; Fleming et al.,  
216 2010), constructed from each participant's subjective confidence, visibility, or attention  
217 ratings: Specifically, for every rating value used by a particular participant, we calculated the  
218 proportion of all correct response trials and the proportion of all incorrect response trials with  
219 ratings that exceeded this value, and then calculated the area under the curve created by  
220 plotting these proportions (on the y- and x-axis, respectively) for all rating values. A value of  
221 1 indicates perfect sensitivity; a value of 0.5 indicates chance performance.  
222

## 223 **EEG recording and preprocessing**

224 EEG was recorded from 32 Ag/AgCl electrodes using a Neuroscan Synamps 2  
225 system. Electrode positions were FP1, FPz, FP1, F7, F3, Fz, F4, F8, FT7, FC3, FCz, FC4,  
226 FT8, T7, C3, Cz, C4, T8, TP7, CP3, CPz, CP4, TP8, P7, P3, Pz, P4, P8, POz, Oz, Oz, and  
227 O2. During recording, all electrode impedances were kept below 50 k $\Omega$ . Four additional  
228 electrodes were placed over the outer canthi of left and right eyes, and above and below the  
229 right eye to measure eye-movements. Two additional electrodes were attached to the left-  
230 and right mastoids, of which the left acted as a reference. All EEG data were recorded at a  
231 sampling rate of 1000 Hz, before being downsampled off-line to 250 Hz, and low pass-  
232 filtered at 48 Hz. EEG data were epoched from 0.5 s before, to 3 s after the onset of the  
233 words 'Get Ready' on screen, and demeaned using the whole-epoch average. Noisy  
234 channels were identified by visual inspection and replaced with the average of nearest  
235 neighbours. In Experiment 1, an average of 0.25 channels were removed (3 over all  
236 participants), and no channels were removed in Experiment 2. Independent component  
237 analysis was performed to identify and remove artefacts using the SASICA toolbox  
238 (Chaumon et al. 2015), and all epochs were visually inspected for rejection. On average  
239 <4% of trials were discarded per participant.  
240

## 241 **Prestimulus Alpha Analysis**

242 Analysis was performed within Matlab (R2019a) using custom scripts, and functions  
243 from the EEGLab (Delorme & Makeig, 2004), FieldTrip (Oostenveld, Fries, Maris, Schoffelen,  
244 2011), and Chronux (Bokil, Andrews, JKulkarni, Mehta, Mitra, 2010) toolboxes. Our analysis  
245 focused on alpha activity in the prestimulus window, covering 1 s between the presentation  
246 of the words 'Get Ready' and onset of the RSVP stream, as well as the amplitude of ERPs  
247 evoked by the RSVP stream. Alpha power, measured over 1 s between the words 'Get  
248 ready' and the onset of the RSVP stream, was strongest over parieto-occipital electrodes  
249 (POz, O1, Oz, O2). We averaged over these electrodes for all our alpha power analyses.  
250 To avoid the possibility of post-stimulus activity (i.e. the RSVP response)  
251 contaminating our measure of alpha power within the prestimulus window, we avoided the  
252 use of a sliding window spectrogram (e.g. Davidson et al., 2020), or time-frequency  
253 decomposition via wavelet transform (e.g. Iemi et al., 2017; Benwell et al., 2017). Instead,



254 single-trial prestimulus alpha power was calculated by applying the Fast Fourier Transform  
255 (FFT) to the Hanning tapered prestimulus period in each epoch. We used a single-taper per  
256 frequency (zero padded, resolution: 0.24 Hz), and retained the complex values of the FFT.  
257 We quantified power by taking the absolute of these complex values, and estimated  
258 prestimulus alpha power by averaging these values over 8-12 Hz at each channel. To  
259 facilitate comparisons across participants, we first applied the z-transform to all single-trial  
260 estimates of alpha power per participant. We sorted single-trial values of alpha power into  
261 quintiles, by binning according to the 0-20%, 21-40%, 41-60%, 61-80% and >80% values of  
262 the cumulative probability distribution of z-transformed prestimulus alpha power. When  
263 sorting by a subclass of outcome (e.g. Hits only), we applied the quintile split after first  
264 restricting to the range of relevant trials. We performed the same quintile separation and  
265 binning procedure when also analysing behavioural and ERP responses by subjective  
266 criteria.  
267

## 268 **ERP analysis**

269 After sorting trials according to quintiles of prestimulus alpha power per participant,  
270 we next characterised how prestimulus alpha power modulates the event-related potentials  
271 evoked by the RSVP stream. Based on previous research, we focused on two measures: the  
272 early sensory-evoked P1 component elicited by the first image of each RSVP stream (which  
273 never contained a target stimulus) and the centro-parietal positivity (CPP or P300) elicited by  
274 detected targets. We use the P1 as a measure of the overall excitability of sensory cortex,  
275 and evaluate the CPP to detected targets as a measure of the strength of evidence  
276 associated with those targets (Murphy et al., 2015; O'Connell et al., 2012; Twomey et al.,  
277 2015).

278 We closely followed the analysis procedures detailed by Rajagovindan and Ding  
279 (2011), to investigate whether prestimulus alpha affected early stimulus processing. To  
280 quantify the amplitude of the P1 component, each whole-trial preprocessed epoch was  
281 additionally filtered between 1 and 25 Hz (one-pass zero phase, hamming-windowed FIR  
282 filters), and a pre-RSVP baseline correction was applied using the period -50 to 0 ms relative  
283 to RSVP onset (950 to 1000 ms relative to the start of each trial). P1 amplitude was  
284 calculated by first averaging all trials within each alpha quintile, and then retaining the  
285 maximum positive peak within the window 80 to 160 ms after RSVP onset. We observed a  
286 reliable P1 component (i.e. positivity in 80-160 ms, across all 5 quintiles), only at the most  
287 occipital electrode sites (O1, Oz, O2), and report the average P1 amplitude averaged across  
288 these electrodes.

289 We also averaged the ERP response to targets which were embedded within the  
290 RSVP stream on target-present trials, focusing in particular on the CPP that is thought to  
291 reflect the accumulating evidence for a decision. Target-locked ERPs were calculated after  
292 filtering preprocessed epochs between 0.1 and 8 Hz to remove the influence of the 10 Hz  
293 RSVP component (one-pass, zero phase, hamming-windowed FIR filters). We then sub-  
294 selected the period -200 ms to 1.5 s relative to target onset, and baseline corrected using  
295 the -100 ms to target onset window. When targets were presented within the RSVP stream  
296 ("Hits" and "Misses"), we quantified the CPP strength by averaging over a cluster of centro-  
297 parietal electrodes (C3, Cz, C4, CP3, CPz, CP4), over the period 250-550 ms relative to  
298 target onset.  
299

300

## 301 **Mixed-effects analyses**

302 One of our key motivations was to assess the effect of prestimulus alpha power, split  
303 into quintiles, on subjective measures. Because we observed a mixture of both linear and  
304 quadratic trends, we utilised mixed-effects models to formally test the nature of these trends,  
305 in preference to other analysis options such as a repeated-measures ANOVA. Our  
306 justification for this choice is two-fold. First, mixed effects models allow us to account for the  
307 amount of variance which is attributable to either individual participants (random effects), or  
308 a relevant category (e.g. fixed effects of alpha). Second, and most importantly, mixed-effect  
309 models are more appropriate to our research question, as by specifically testing either a  
310 linear or quadratic model, we can explicitly compare which may be a better fit to the data.

311 We formally tested the nature of linear and quadratic coefficients by performing a  
312 series of stepwise mixed effects analyses to model either linear or quadratic fixed effects of  
313 alpha power, which included random effects (intercepts) per participant. We performed  
314 likelihood ratio tests between the full model, which combined random, linear, and quadratic  
315 effects, to restricted models of increasing simplicity (removing first the quadratic, and then  
316 linear term). We compared the goodness-of-fit for each model using likelihood ratio tests,  
317 and in our results report when either the linear or quadratic model was a better fit to the data  
318 than the basic model, which included only random effects per participant. When a significant  
319 linear or quadratic effect is reported, the fixed effect coefficient ( $\beta$ ) and 95% confidence  
320 intervals are also included.

321

## 322 **Mediation analysis**

323 As a consequence of our finding that prestimulus alpha influenced both attention  
324 ratings and the target-locked ERP components (see *Alpha power quadratically modulates*  
325 *event-related potentials* below, in Results), we performed a mediation analysis using the  
326 mediation toolbox (Wager, 2020). This analysis assessed whether subjective attention  
327 mediated the linear relationship between the strength of sensory evidence (here: CPP  
328 amplitude) and either confidence or visibility reports. Consistent with standard notation for  
329 mediation analyses (Baron & Kenny, 1986), we refer to the overall effect between predictor  
330 (X) and outcome (Y) as path *c*. The direct effect, when controlling for the mediator (M), is  
331 denoted as *c'*. Path *a* denotes the path between predictor and mediator (controlling for Y),  
332 and path *b* the path between mediator and outcome (controlling for X). Path *a\*b* refers to the  
333 mediation effect. To identify the presence of a significant mediation, we required all three  
334 paths (*c*, *a*, *b*, *a\*b*) to be significant ( $p < .05$ ; Baron and Kenny 1986) to establish the  
335 presence of mediation. Each path at the participant level was first assessed using linear  
336 regression, and assessed for significance using a bootstrap test implemented in the  
337 mediation toolbox ( $n\ samples = 1000$ ). For input into the mediation analysis, we used the  
338 single-trial values of CPP amplitude as predictor values (X), and subjective confidence or  
339 visibility as our outcome values (Y). We included attention ratings as our mediator (M) and  
340 included alpha power as a covariate, controlled for in all regressions. At present, the  
341 mediation toolbox does not support testing quadratic associations, and as such we focused  
342 on the linear relationships between CPP amplitude and subjective ratings.

343

344

## Results

345

346

347

348

349

350

351

352

We recorded continuous measures of both confidence and attention (Experiment 1), and visibility and attention (Experiment 2) on a trial-by-trial basis in a visual detection task. We first present the behavioural results from these tasks, showing an asymmetry in the behavioural correlations between subjective measures and objective performance. We then report how differences in these performance measures are influenced by prestimulus alpha power. Finally, we show that alpha power quadratically modulates the generation of sensory-evoked potentials, which in turn correlates with confidence and visibility judgements.

353

### Behavioural Results

354

#### Confidence and visibility correlate differently with attention ratings

355

356

357

358

359

360

361

362

363

364

The use of subjective responses and introspective accuracy varied between Experiments 1 and 2. After each trial, participants were asked to indicate either their trial-specific confidence and attention ratings (Experiment 1), or visibility and attention ratings (Experiment 2) by providing a single mouse-click within a response square. **Figure 2A** displays the cumulative total click responses in both experiments. Trials in which targets were presented within the RSVP stream are shown in orange, trials without a target are shown in purple. Figure 2 plots data pooled across all participants, but key trends apparent here are mirrored in single-participant data (see **Supplementary Figures 1 and 2**), despite typically-observed idiosyncratic differences across participants in their use of subjective rating scales (cf. Ais et al., 2016).

365

366

367

368

369

370

371

372

373

374

375

376

377

378

379

380

381

382

383

384

385

386

In Experiment 1, participants rated their confidence in the presence or absence of a target on the x-axis, and attentional state rating on the y-axis. Single-clicks on the left half of the response screen represent confidence values ranging from 'Sure absent' to 'Unsure', and the right half represent 'Unsure' to 'Sure present'. As such, purple dots on the left half represent increasing confidence in the absence of a physically absent target (correct rejection), while orange dots on the left half represent confidence in the absence of a target that was physically present (miss). Orange and purple dots on the right-hand side represent, respectively, the confidence in present targets (hits), and confidence in target presence when, objectively, no target was presented (false alarm). A qualitative inspection reveals a dense diagonal cloud of responses, indicating that confidence in the presence and absence of targets correlated with attentional state ratings. This diagonal density of responses can be appreciated in **Figure 2B**, where the absolute value of confidence from 'Unsure' to 'Sure', is plotted against attentional state ratings, pooling both sure present and sure absent on the x-axis. To assess the strength of these correlations quantitatively, we calculated the non-parametric linear correlation coefficient between attention and confidence ratings, separately for each participant for target-present and target-absent trials. This analysis revealed a consistently positive correlation between trial-wise attentional state ratings and confidence, both in the presence of a target (one-sample  $t$ -tests against zero,  $t(11) = 7.74$ ,  $p < .001$ ,  $d = 2.23$ ) as well as the absence of a target ( $t(11) = 2.61$ ,  $p = .025$ ,  $d = 0.78$ ). The strength of these correlations differed significantly, revealing an asymmetry between subjective measures of attention and decision confidence in the presence or absence of a target (paired samples  $t$ -test,  $t(11) = 5.23$ ,  $p < .001$ ,  $d = 1.51$ ; **Figure 2C**).

387           In Experiment 2, participants rated the visibility of the target, responding to the  
388 prompt “How much of the target did you see?”, by clicking on the x-axis between the ranges  
389 of ‘None’ to ‘All’. As such, purple dots at the far-left value (zero) of the visibility scale  
390 represent correct rejections (trials without a target, rated as such) and orange dots at this  
391 value represent missed targets, whereas purple and orange dots with non-zero values  
392 represent false alarms and hits, respectively. In contrast to Experiment 1, no consistent  
393 correlation was observed between visibility judgements and attention ratings ( $t(8) = .09$ ,  $p$   
394  $= .93$ ; **Figure 2F**).

395           We return to this asymmetric pattern of responses in our Discussion. For now, we  
396 note two aspects of these data that provide important context for the detailed EEG analyses  
397 to follow. First, the results indicate that participants did not base their attentional state ratings  
398 solely on their sensory experience of seeing vs. not seeing a target stimulus (“I saw a target  
399 clearly so I must’ve been paying attention”, cf. Head & Helton, 2018): confidence that a  
400 target was absent increased rather than decreased with attention ratings in Experiment 1,  
401 and no hint of a correlation was apparent between visibility and attention ratings in  
402 Experiment 2. Second, the contrast between Experiments 1 and 2 suggest that different  
403 information is conveyed in confidence and visibility ratings, with confidence being markedly  
404 more sensitive to variations in (rated) attentional state.  
405

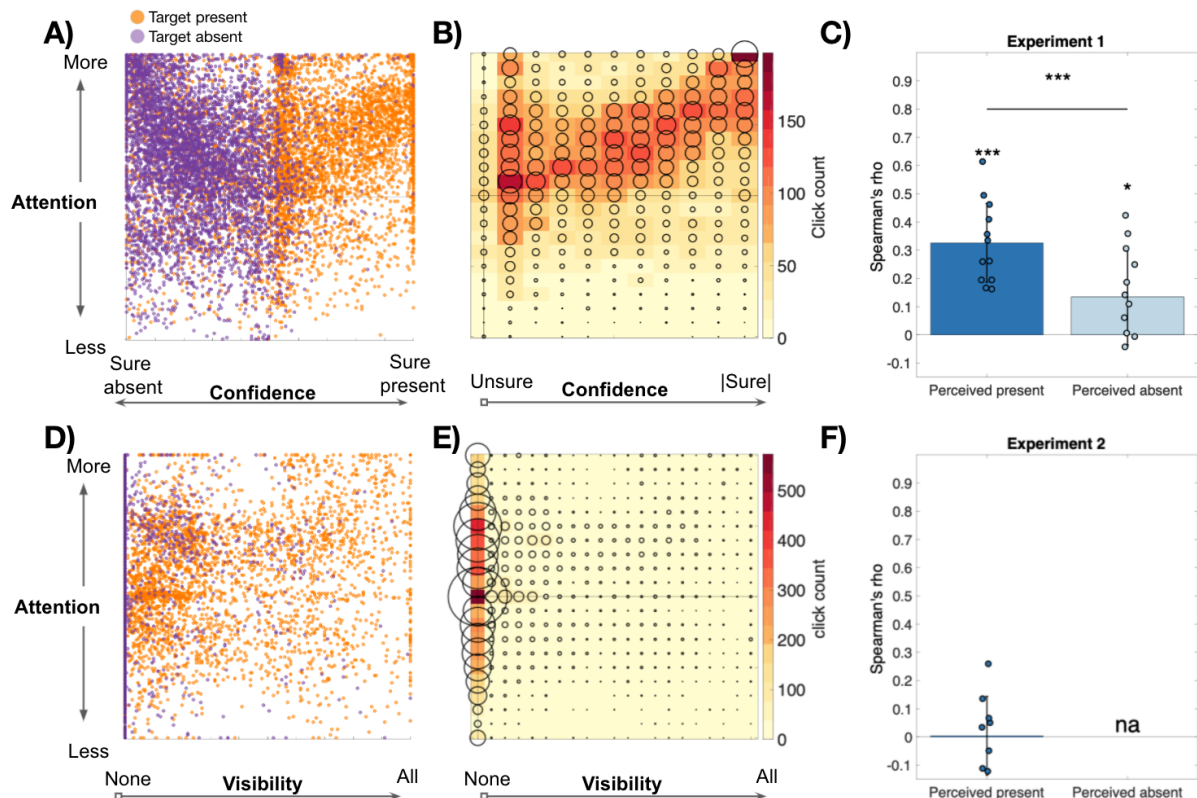

406  
407

408 **Figure 2.** Subjective responses to the same visual detection task. **A)** In Experiment 1,  
409 participants rated their decision confidence that a target was either absent or present,  
410 simultaneously with their subjective attention, with a single click in the response square.  
411 Orange dots indicate target present trials, purple dots represent target absent trials. **B)**  
412 Increases in subjective confidence positively correlated with an increase in attention. **C)**  
413 Average linear correlation coefficients were significantly positive for attention and perceived-  
414 presence (orange), as well as attention and perceived-absence (purple). Error bars display 1  
415 SD. **D)** In Experiment 2, participants rated the subjective visibility of targets on the x-axis.  
416 Colour conventions are the same as in A-C). **E-F)** Subjective visibility did not positively  
417 correlate with attention ratings. Note: no correlation is calculated for “Perceived absent” trials  
418 in Experiment 2 because these trials were defined as having the same (zero) visibility rating  
419 on all trials.

420

421

### Matched objective performance and metacognitive sensitivity

422

423

424

425

426

427

428

429

430

431

In contrast to this varied pattern of subjective responses, objective task performance was very similar across both experiments (**Figure 3**). Before each experiment, target contrast was adapted using a staircase procedure to approximate 75% detection accuracy for each participant. Mean contrast values were 0.15 ( $SD = 0.02$ ) for Experiment 1, and 0.16 ( $SD = .02$ ) for Experiment 2. Overall accuracy, incorporating target-absent trials, was 81% ( $SD = 4\%$ ) for Experiment 1, and 80% ( $SD = 8\%$ ) for Experiment 2, with no significant difference in performance between experiments,  $t < 1$  (**Figure 3A**). Mean detection rates in both experiments (Experiment 1 = 71%,  $SD = 8\%$ ; Experiment 2 = 73%,  $SD = 8\%$ ) were not significantly different,  $t < 1$ . False alarm rates (Experiment 1 = 9%,  $SD = 5\%$ ; Experiment 2 = 13%,  $SD = 13\%$ ) were also not significantly different,  $t(19) = -1.02$ ,  $p = .32$ . We observed

432 similar results for perceptual sensitivity ( $d'$ ; Experiment 1 = 2.01,  $SD = 0.57$ ; Experiment 2 =  
433 1.98,  $SD = 0.72$ , **Figure 3B**) and criterion ( $c$ ; Experiment 1 = 0.43,  $SD = 0.22$ ; Experiment 2  
434 = 0.36,  $SD = 0.38$ ), which did not significantly differ between experiments (both  $p > .59$ ).

435

436 We also calculated the metacognitive (type-2) sensitivity based on confidence and  
437 visibility ratings. Type-2 sensitivity captures the degree to which subjective ratings correlate  
438 with the objective likelihood of successful task performance—i.e., the degree to which the  
439 true positive rate exceeds the false positive rate at each rated value of confidence/visibility  
440 The mean type-2 performance in Experiment 1 ( $M = 0.85$ ,  $SD = .07$ ), was not significantly  
441 different to Experiment 2 ( $M = 0.82$ ,  $SD = .07$ ;  $t(19) = 1.05$ ,  $p = .31$ ; **Figure 3C**), and both  
442 differed significantly from chance (both  $t > 13$ ,  $p < .001$ ), despite the large differences  
443 observed in the pattern of subjective responses.

444 We also took the opportunity to calculate metacognitive sensitivity based on attention  
445 state ratings—i.e., the degree to which participants' attentional state ratings were calibrated  
446 with the likelihood of a correct response. Although a nascent literature, metacognitive  
447 sensitivity based on attention ratings has recently been shown to approximate type-2  
448 sensitivity based on confidence, in a somatosensory detection task (e.g. Whitmarsh et al.,  
449 2014; 2017). In the current visual detection tasks, type-2 sensitivity based on attentional state  
450 ratings in Experiment 1 ( $M = 0.54$ ,  $SD = .05$ ) was significantly lower than when based on  
451 confidence ( $t(11) = 18.74$ ,  $p = 1.07 \times 10^{-9}$ ,  $d = 5.41$ ). Similarly, type-2 sensitivity based on  
452 attentional state ratings in Experiment 2 was significantly lower than visibility-based type-2  
453 sensitivity ( $M = .49$ ,  $SD = .03$ ;  $t(8) = 11.60$ ,  $p = 2.77 \times 10^{-6}$ ,  $d = 3.87$ ). Only the attention-  
454 based type-2 sensitivity in Experiment 1, was significantly above chance ( $t(11) = 3.51$ ,  $p =$   
455  $.005$ ,  $d = 1.01$ ) and the strength of this type-2 sensitivity differed significantly between  
456 experiments ( $t(19) = 2.88$ ,  $p < .01$ ,  $d = 1.03$ ). This latter result mirrors the patterns shown in  
457 Figure 2, in which attention ratings correlated with confidence (in Experiment 1) but not  
458 visibility ratings (in Experiment 2).

459 Next, we investigated whether objective accuracy and metacognitive sensitivity  
460 varied with participants' evaluations of their attentional states (**Figure 3D-G**). Replicating  
461 previous findings, performance varied significantly as a function of rated attention, with  
462 objective accuracy differing significantly across attention quintiles in Experiment 1 ( $F(4,44) =$   
463  $15.71$ ,  $p < .001$ ,  $\eta_p^2 = .59$ ) and Experiment 2 ( $F(4,44) = 7.83$ ,  $p < .001$ ,  $\eta_p^2 = .50$ ). Perceptual  
464 sensitivity ( $d$ -prime) increased with attention ratings in Experiment 1 ( $F(2,14, 23.54) = 6.75$ ,  
465  $p < .001$ ,  $\eta_p^2 = .38$ ; Greenhouse-Geisser corrected), but not significantly in Experiment 2 ( $p =$   
466  $.06$ ). Criterion was not affected by attention in either study ( $ps > .2$ ). A more novel finding  
467 was that metacognitive sensitivity also significantly increased alongside higher attention  
468 ratings in both Experiment 1 ( $F(4,44) = 12.09$ ,  $p < .001$ ,  $\eta_p^2 = .52$ ), and Experiment 2 ( $F(4,44)$   
469  $= 6.67$ ,  $p < .001$ ,  $\eta_p^2 = .46$ ). Thus, when more attentive, participants were not only better at  
470 the task, but also more accurately evaluated their perceptions and decisions.

471 Overall, therefore, in our behavioural data we observed quantitatively distinct  
472 patterns of responses when participants were asked to report either their decision  
473 confidence and attention, or visibility and attention, despite matched objective performance.  
474 In both experiments, performance increased with self-rated attention, yet only confidence,  
475 but not visibility, also positively correlated with attention ratings. To unpack this discrepancy,  
476 we turn to pre-stimulus alpha power, which has been linked to the subjective intensity of  
477 visibility (Benwell et al., 2017); confidence (Samaha et al., 2018) and attention (MacDonald  
478 et al., 2011) in visual tasks.

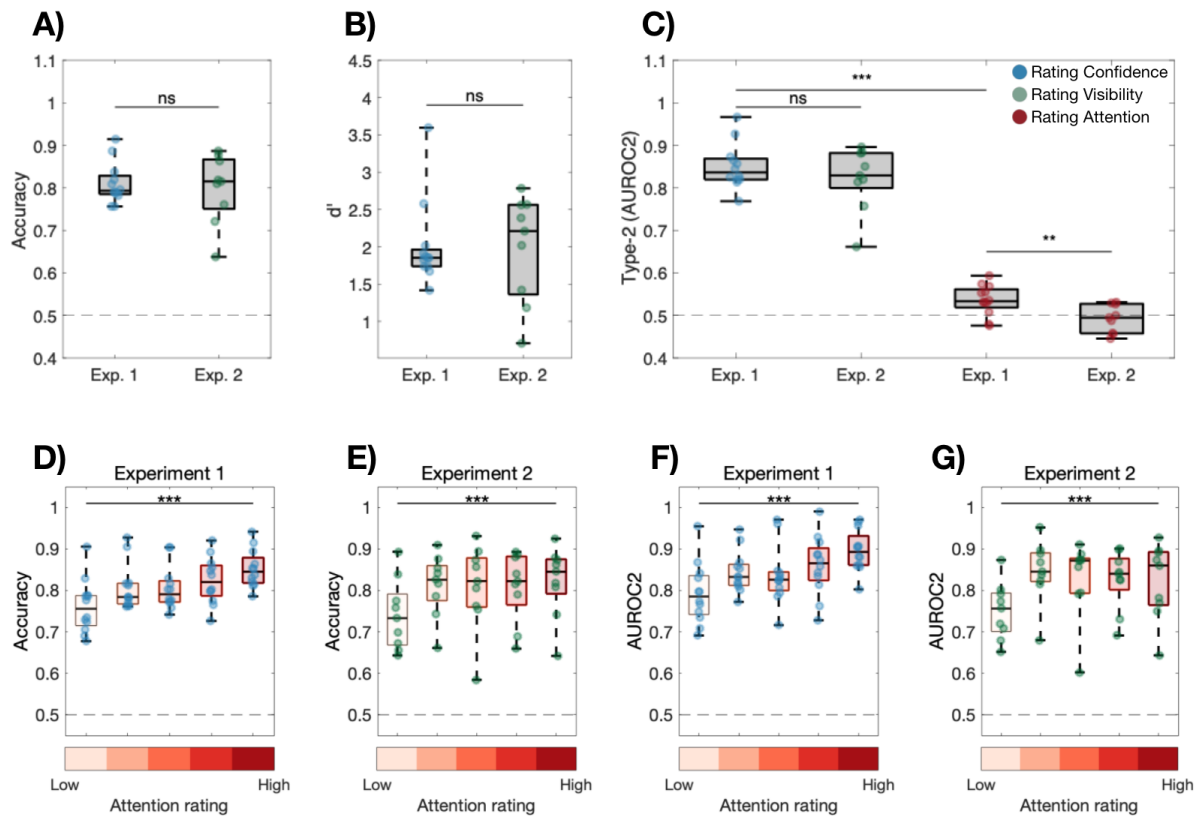

479  
480

481 **Figure 3.** Objective and metacognitive accuracy in both experiments. A) No significant  
482 difference was observed in objective accuracy across experiments. B) Signal-detection theory  
483 measures of sensitivity ( $d'$ ) was also similar across experiments. C) Metacognitive sensitivity  
484 was greatest for confidence and visibility judgements, and did not differ significantly between  
485 experiments. Metacognitive sensitivity based on attention was significantly stronger in  
486 Experiment 1, although significantly weaker than metacognitive sensitivity based on  
487 confidence or visibility judgements in both experiments. D-E) In both experiments, accuracy  
488 increased with the intensity of subjective attention. F-G) In both experiments, metacognitive  
489 sensitivity also increased with subjective attention. In each box, the bottom, central, and top  
490 line indicate the 25th, 50th, and 75th percentiles respectively. Whiskers extend to the furthest  
491 data points.

492

493

## 494 EEG results

495 We analysed the power of alpha oscillations (8-12 Hz) over a 1 s prestimulus period,  
496 from the onset of the words 'Get-Ready' to the first presentation of an image in the RSVP  
497 stream (hereafter 'alpha power'). Consistent with previous reports (Macdonald et al. 2011;  
498 Samaha et al. 2017), we observed alpha power to be strongest over a cluster of parieto-  
499 occipital electrodes, and focus our remaining analysis on this subset (**Figure 4**). To preview  
500 our results, in both experiments, we observed that subjective attention ratings decreased  
501 with increased prestimulus alpha power. In contrast to these linear effects, we observed a  
502 quadratic, inverted-U function linked prestimulus alpha power to subjective confidence and  
503 visibility.

504 **Alpha power is negatively correlated with subjective attention**

505 For the effect of alpha power on subjective attention ratings, when rating attention on  
506 all trials, the linear model differed significantly from the basic model, confirming a significant  
507 linear effect of alpha power on subjective attention in Experiment 1 ( $\chi^2(1) = 16.14, p = 5.90 \times$   
508  $10^{-5}, \beta = -0.04 [-0.06, -0.02]$ ). We further subdivided our analysis into target-present, and  
509 target-absent cases. Our motivation was to inspect whether the intervening presence (or  
510 absence) of a target between the prestimulus window and subsequent subjective rating  
511 would impact upon the observed relationship between prestimulus alpha power and  
512 attention. A key point is that this distinction allows us to investigate whether the influence of  
513 alpha exclusively biases the strength of evidence in favour of target detection.

514 When restricted to target-present trials, a linear effect of alpha power was again the  
515 best fitting model in Experiment 1 ( $\chi^2(1) = 19.94, p = 7.99 \times 10^{-6}, \beta = -0.06 [-0.08, -0.03]$ ).  
516 When analysing the matched subset of target-absent trials, a weaker effect of prestimulus  
517 alpha on attention was observed ( $\chi^2(1) = 5.13, p = .024, \beta = -0.03 [-0.05, -0.004]$ ). We  
518 formally tested for the equivalence of regression coefficients (cf. Eqn 4, Paternoster et al.,  
519 1998) and found the regression slopes to significantly differ between target-present and  
520 target-absent trial types ( $Z = -1.91, p = .028$ ). This result indicates that although prestimulus  
521 alpha power was consistently negatively related to subjective attention, the effect of this  
522 relationship was strongest when reflecting on target-present, compared to target-absent  
523 trials.

524 The same pattern of results was present in Experiment 2. When considering all  
525 targets together, the linear model differed significantly from the basic model ( $\chi^2(1) = 4.97, p$   
526  $= .025, \beta = -0.02 [-0.04, -0.003]$ ). This effect was again strongest when considering target-  
527 present trials ( $\chi^2(1) = 4.41, p = .036, \beta = -0.02 [-.04, -0.001]$ ), as the linear model did not  
528 differ significantly from the basic model in target-absent trials ( $p = .6$ ). However, the  
529 difference between the linear regression coefficients for target-present and target-absent  
530 classes was not significant ( $p = .42$ ), reflecting the similar negative trend apparent in both  
531 trial types.

532



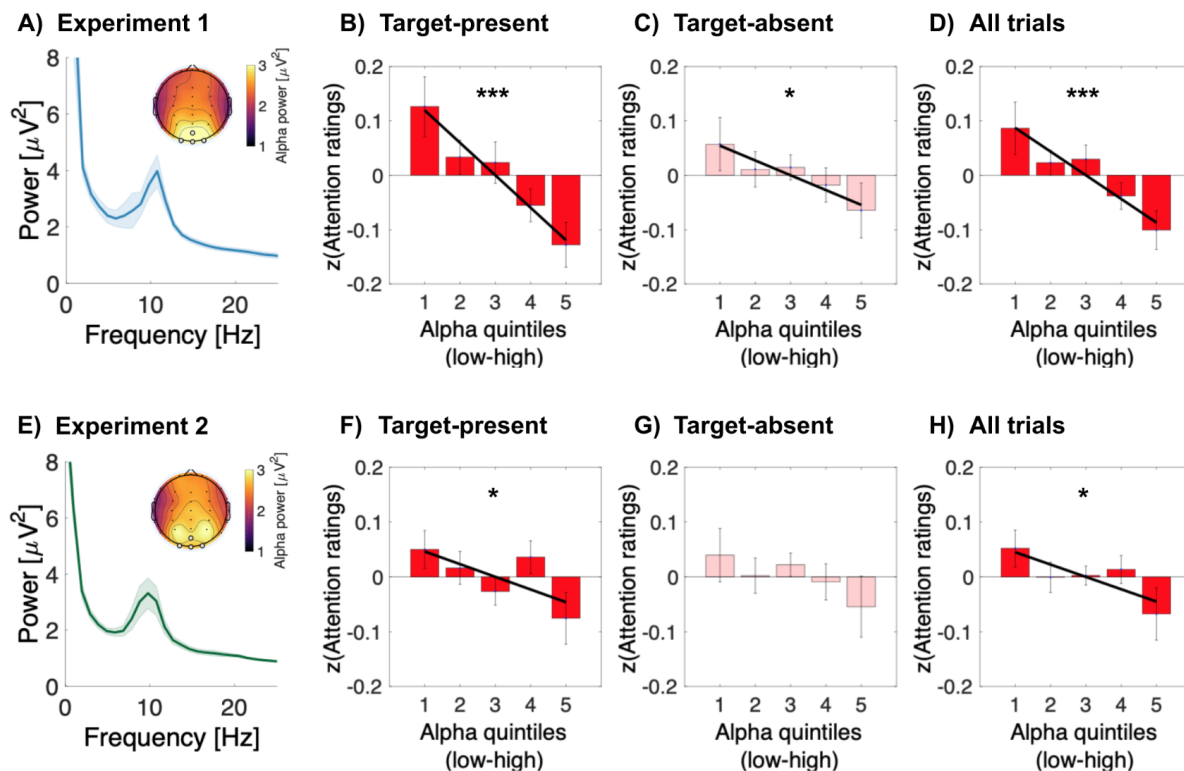

533  
534  
535  
536  
537  
538  
539  
540  
541  
542

**Figure 4 . Prestimulus Alpha power is negatively correlated with attention ratings.** In Experiment 1, strong prestimulus alpha over occipital electrode sites correlated negatively and linearly with attention ratings on both target-present (B) and target-absent (C) trials, as well as in the pooled data (D). In Experiment 2, a similar profile of alpha power (E) negatively correlated with alpha power on target-present trials (F) and in a pooled analysis (H), but not reliably in target-absent trials (G). Error bars represent 1 SEM, corrected for within-participant comparisons (Cousineau, 2005). Black lines display linear lines of best fit. Asterisks denote significant linear effects. \*\*\*  $p < .001$ , \*  $p < .05$ .

543

### Alpha power quadratically modulates confidence and visibility

544  
545  
546  
547  
548  
549  
550  
551  
552  
553  
554  
555  
556

In contrast to the monotonic and approximately linear relationship between alpha power and attention ratings, alpha power showed a quadratic relationship with the two other introspective ratings (confidence and visibility) that were recorded simultaneously with self-reported attention. In Experiment 1, a consistent quadratic trend was found, linking intermediate prestimulus alpha power to enhanced confidence that a target was present in the RSVP stream. This effect was strongest when considering decision confidence across all trials, as the quadratic model differed significantly from the basic model ( $\chi^2(1) = 11.15$ ,  $p = .004$ ,  $\beta = -0.02$  [-0.03, -0.007]). The same quadratic trend was found when subdividing into the subset of only target-present trials, but was not significant ( $\chi^2(1) = 2.99$ ,  $p = .08$ ). On target-absent trials alpha power significantly and quadratically modulated confidence, i.e., (misplaced) confidence that a target was presented ( $\chi^2(1) = 6.58$ ,  $p = .037$ ,  $\beta = -0.02$  [-0.04, -0.004]; **Figure 5A-C**). In Experiment 2, when rating target-visibility, the same quadratic trend appeared. The quadratic effect was significant only on target-present trials ( $\chi^2(1) = 11.17$ ,  $p =$

557 .004,  $\beta = -0.02$  [-0.04, -0.007]). For target-absent trials, or when all trials were pooled  
 558 together, neither linear or quadratic models were a better fit to the data than the basic model,  
 559 with only random effects per subject (all  $p > .2$ ), reflecting very low variability in participants'  
 560 visibility ratings on target-absent trials (in which the vast majority of trials were given the  
 561 same [zero] visibility rating).  
 562

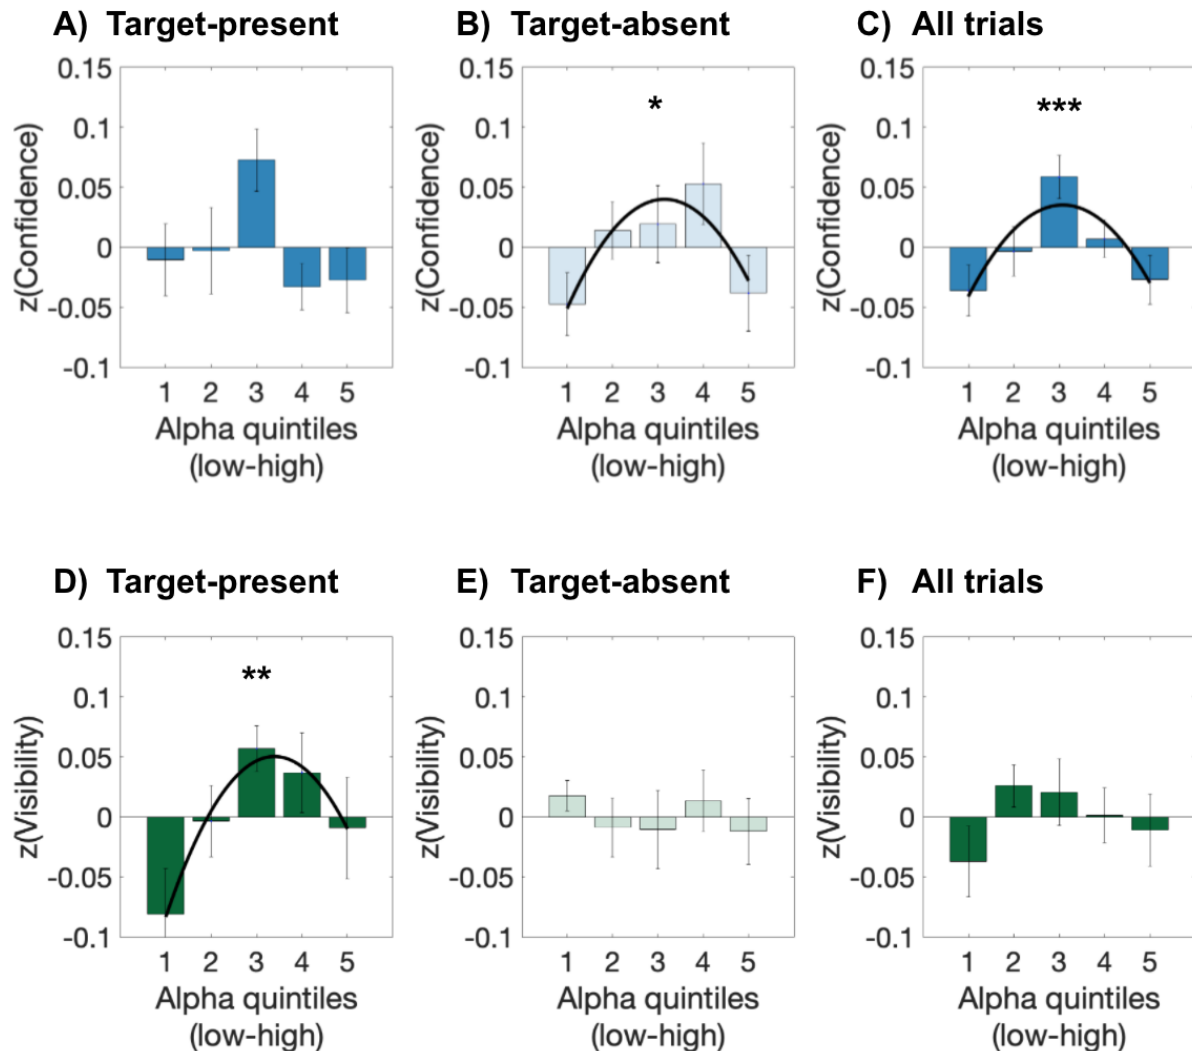

563  
 564

565 **Figure 5. Prestimulus alpha power is quadratically related to subjective visibility and**  
 566 **confidence. A-C)** Decision confidence in the presence of a target is maximal at intermediate  
 567 values of alpha power. **D)** Subjective target visibility is maximal at intermediate values of alpha  
 568 power on target-present trials. **E)** No significant effect of prestimulus alpha on visibility when  
 569 targets are absent, or **F)** when pooling across all target types. Error bars represent 1 SEM,  
 570 corrected for within-participant comparisons (Cousineau, 2005). Quadratic lines of best fit are  
 571 shown in black. Asterisks mark significant quadratic fits. \*  $p < .05$ , \*\*  $p < .01$ , \*\*\*  $p < .001$   
 572  
 573

## 574 **Alpha power quadratically modulates behavioural performance**

575 Recent work has shown that prestimulus alpha power may uniquely mediate  
576 subjective criteria, while leaving objective accuracy unchanged (for review Samaha et al.,  
577 2020). In our data, we have seen a strong and consistent relationship between alpha power  
578 and subjective ratings of attentional state, as well as a significant relationship between rated  
579 attention and behavioural accuracy (**Figure 3**). We next examined whether alpha power  
580 would also affect objective measures of performance, and focused our analyses on  
581 accuracy, hit and false alarm rates, as well as signal detection metrics of sensitivity ( $d'$ ) and  
582 criterion ( $c$ ). Finally, we also investigated whether metacognitive sensitivity, which was  
583 enhanced by subjective attention, would also vary with prestimulus alpha power. Following  
584 previous research (e.g. Busch et al., 2009; lemi et al., 2018), we first normalized these  
585 responses per subject, by dividing by the mean across all alpha quintiles.

586 As both experiments had a very similar task structure, and objective accuracy was  
587 very similar between Experiments 1 and 2, we continued by pooling the data across all 21  
588 participants to increase statistical power. The pattern of results we present (**Figure 6**) are  
589 consistent, although statistically weaker when keeping each cohort separate, as shown in  
590 the Supplementary materials.

591 Alpha power significantly affected overall accuracy. Both the linear ( $\chi^2(1) = 8.40, p =$   
592  $.004, \beta = 0.006 [0.002, 0.01]$ ) and quadratic models ( $\chi^2(1) = 10.87, p = .005, \beta = -0.002, [-$   
593  $0.006, -0.0007]$ ) were superior fits than the basic model. When comparing the linear and  
594 quadratic fits, neither were a better fit to the data ( $p = .12$ ). Post-hoc comparisons, adjusting  
595 for a family-wise error rate of 10, revealed that only the lowest and intermediate alpha bins  
596 differed significantly (Bin 1 vs. 3:  $t(20) = -2.91, p_{\text{bonf}} = .047, d = -0.57$ ). Therefore, like  
597 subjective visibility and confidence ratings, the effect was an enhancement of objective  
598 accuracy at intermediate alpha power.

599 In stimulus detection tasks, accuracy measures can be influenced by both the  
600 likelihood of detecting a present target, as well as withholding responses on target-absent  
601 trials. To parse these effects, we also analysed SDT stimulus-response categories of  
602 performance. Alpha power significantly affected the normalized hit-rate during all trials, and a  
603 quadratic model was again the best fit to the data ( $\chi^2(1) = 12.39, p = .002, \beta = -0.008 [-0.015,$   
604  $-0.001]$ ). When comparing linear and quadratic models, likelihood ratio tests revealed the  
605 quadratic model was a significantly better fit ( $\chi^2(1) = 5.54, p = .02$ ), with post hoc comparisons  
606 again revealing that this effect was driven by a significant difference between the lowest and  
607 intermediate alpha power bins (Bin 1 vs. 3:  $t(20) = -3.39, p_{\text{bonf}} = .011, d = -0.61$ ). A quadratic  
608 model was the best fit to the data for the FA rate ( $\chi^2(1) = 7.43, p = .024, \beta = -0.06 [-0.1, -$   
609  $0.008]$ ), which significantly improved upon the linear model ( $\chi^2(1) = 6.37, p = .012$ ). Given  
610 this parallel increase in hits and false alarms at intermediate levels of prestimulus alpha, it is  
611 not surprising that we do not find a significant effect of prestimulus alpha power on sensitivity  
612 ( $d'$ ), somewhat in contrast to the quadratic effects apparent in the simpler measure of  
613 overall accuracy (which in our data is primarily driven by hit rate because of the low  
614 incidence of false alarms). More surprisingly, given the increase we observed in both hits  
615 and false alarms at intermediate levels of alpha, and given recent evidence that low  
616 prestimulus alpha power is associated with a more liberal detection criterion (for review  
617 Samaha et al., 2020), we found no significant effect of prestimulus alpha power on criterion  
618 ( $p_s > .5$ ). Similarly, alpha power did not significantly affect type-2 sensitivity ( $p_s > .16$ ).

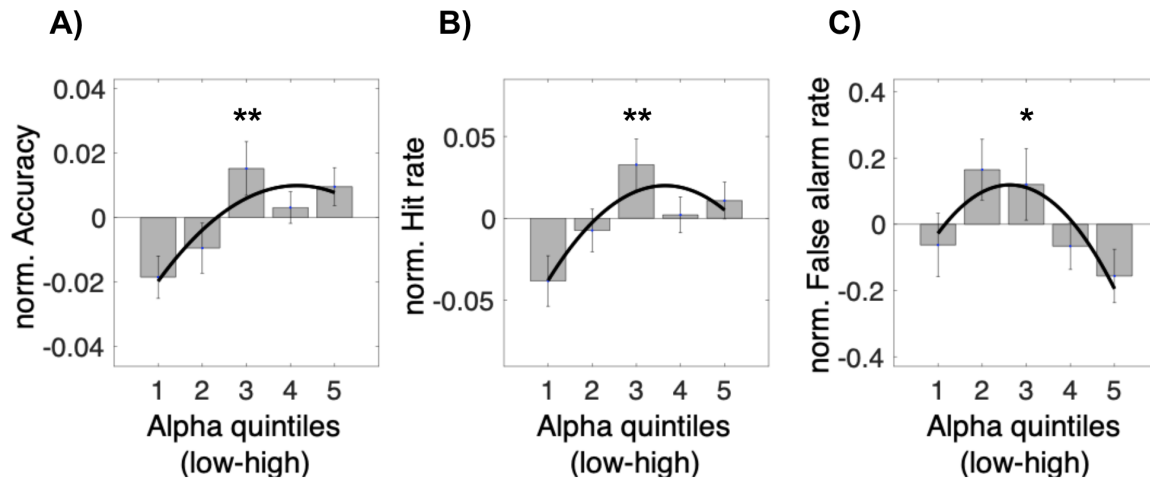

619  
620  
621  
622  
623  
624  
625  
626

**Figure 6. Prestimulus alpha power and behavioural performance.** Prestimulus alpha power quadratically modulates a) accuracy, b) hit-rate, and c) false-alarm rate in combined experimental data (N=21). Responses are normalized per subject, by dividing by the mean across alpha bins, and zero centred by subtracting by 1. \*  $p < .05$  \*\*  $p < .01$ . For separate experiments, see Supplementary Figure 3.

627

### Alpha power quadratically modulates event-related potentials

628

629

630

631

632

633

634

635

636

637

638

639

640

641

642

643

644

645

646

647

648

649

650

651

652

**Quadratic modulation of early sensory-evoked response (P1).** How the generation of sensory evoked potentials are influenced by prestimulus neural activity is the focus of ongoing research (e.g. Iemi et al., 2019; Gruber et al., 2014; Min et al., 2007). Notably, a quadratic, inverted-U function such as the type we report above, linking prestimulus alpha power to confidence and visibility reports, has also been reported to link alpha power and the amplitude of the early P1 component of the ERP (Rajagovindan & Ding, 2011). Accordingly, we tested whether the amplitude of the P1 component evoked 80-160 ms after RSVP onset was also modulated by prestimulus alpha power. The quadratic model was a significant improvement upon the basic ( $\chi^2(1) = 9.47, p = .009, \beta = -0.08 [-0.15, -0.02]$ ), and the linear model ( $\chi^2(1) = 7.26, p = .007$ ) demonstrating that alpha power quadratically modulates the amplitude of the early P1 component. The same pattern,

653 although statistically weaker, was observed in the data for Experiment 1 when analysed  
654 separately (quadratic:  $\chi^2(1) = 12.49$ ,  $p = .002$ ,  $\beta = -0.12$  [-0.20, -0.03]; comparison:  $\chi^2(1) =$   
655  $7.36$ ,  $p = .006$ ), though did not reach significance in Experiment 2 ( $ps > .3$ ) (**Figure 7B**).

656

657 **Quadratic modulation of the centro-parietal positivity (CPP).** Next, as an index of  
658 decision-related processes, we investigated whether the amplitude of target-locked activity  
659 evoked on 'Hit' trials (successful detection of present targets) was also modulated by  
660 prestimulus alpha power. In the scalp EEG, we observed a typical broad CPP after target  
661 onset that was strongest over central electrodes (C3, Cz, C4, CP3, CPz, CP4). We  
662 computed the average CPP amplitude across these electrodes, over the period 250 to 550  
663 ms relative to target onset, based on prestimulus alpha power quintiles. We observed that a  
664 quadratic fit was the best fit to the data, and a significant improvement upon the basic ( $\chi^2(1)$   
665  $= 6.78$ ,  $p = .034$ , ( $\beta = -0.15$  [-0.33 -0.03]), but not the linear model ( $p = .1$ ). When examining  
666 each experiment in isolation, the same pattern was only significant in Experiment 1  
667 (quadratic;  $\chi^2(1) = 7.64$ ,  $p = .02$ ,  $\beta = -0.24$ , [-0.52, -0.03]), with neither the linear or quadratic  
668 models reaching significance in Experiment 2 ( $ps > .7$ ).

669

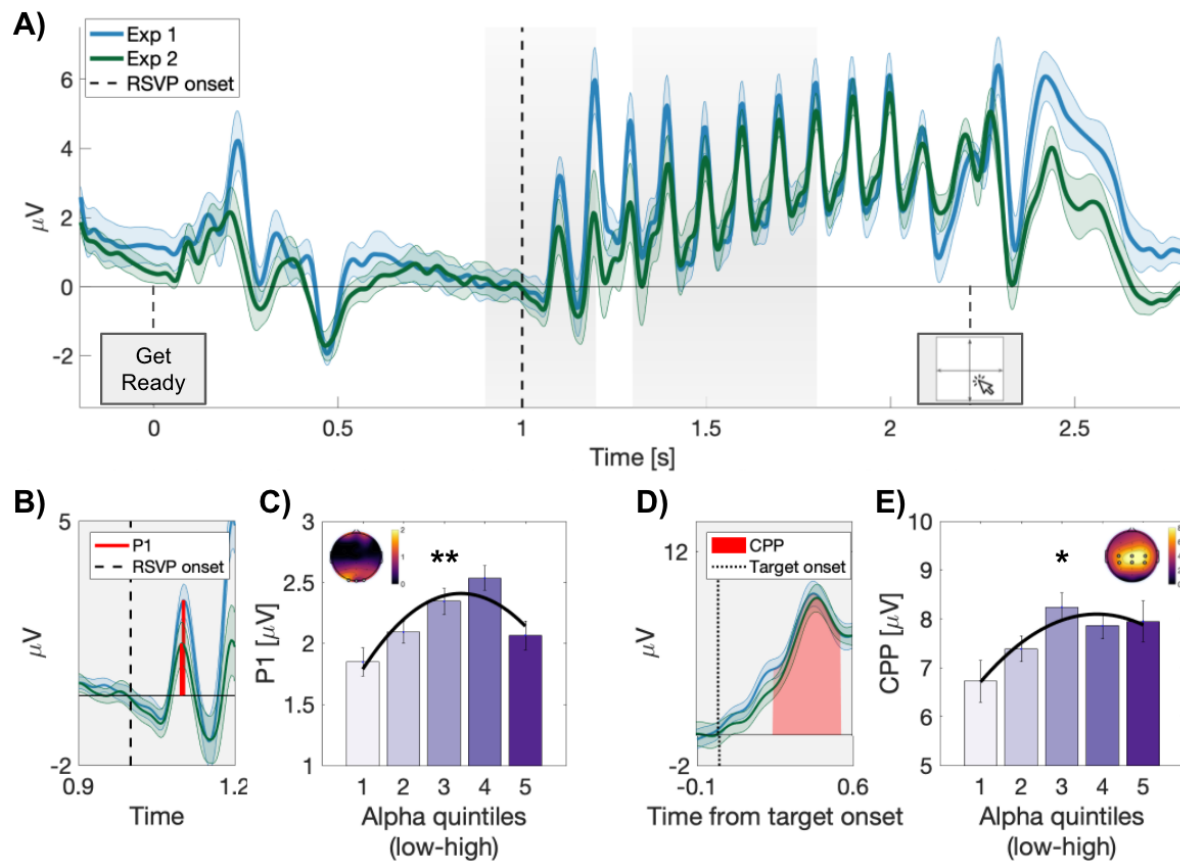

670  
671  
672  
673  
674  
675  
676  
677  
678  
679  
680

**Figure 7. Prestimulus alpha power quadratically modulates event-related potentials.** A) Grand average whole-trial epochs for Experiments 1 and 2. Grey shaded regions note the time windows used to calculate the P1, and target-locked centro-parietal positivity (CPP; see Methods). B) Grand average P1 from Experiments 1 and 2. C) Prestimulus alpha power quadratically modulates the amplitude of the early P1 component, evoked by the first image in our RSVP stream. D) Grand average target-locked CPP. Red shading indicates 250-550ms relative to target onset. E) Average CPP amplitude over the period 250-550 ms relative to target onset. In all plots error bars and shading indicate 1 SEM, corrected for within-participant comparisons (Cousineau, 2005). \*  $p < .05$ , \*\*  $p < .01$ .

### 681 The CPP positively correlates with subjective confidence and visibility

682 We have shown that alpha power quadratically modulated subjective confidence and  
683 visibility, as well as the strength of early (P1) and late (CPP) event-related potentials.  
684 Previous research has also shown that the amplitude of the CPP captures the strength of a  
685 perceptual experience (e.g., Tagliabue et al., 2019), consistent with the notion that it indexes  
686 the strength of accumulated evidence in favour of a particular perceptual decision (Murphy et  
687 al., 2015; O'Connell et al., 2012; Twomey et al., 2015). We therefore next tested whether  
688 CPP amplitude in our paradigm varied with subjective ratings of confidence, visibility, or  
689 attention. Consistent with our expectations, we observed that the amplitude of the CPP  
690 varied strongly and consistently with both confidence and visibility ratings. In Experiment 1,  
691 CPP strength increased with subjective confidence (linear:  $\chi^2(1) = 14.13$ ,  $p < .001$ ,  $\beta = 0.85$ ,  
692 [0.55, 1.15]). In Experiment 2, CPP strength also increased with subjective visibility (linear:  
693  $\chi^2(1) = 14.13$ ,  $p < .001$ ,  $\beta = 0.85$ , [0.55, 1.15]).

694           In contrast to the consistent monotonic, linear relationship between CPP amplitude  
695 and confidence/visibility ratings, a more complex relationship was observed between CPP  
696 amplitude and attention ratings (**Figure 8**). In Experiment 1, although we observed that CPP  
697 amplitude was maximal at highest ratings of attention, the best fit to the data was a quadratic  
698 model rather than a linear one (quadratic:  $\chi^2(1) = 15.16$ ,  $p < .001$ ,  $\beta = 0.85$ ,  $[0.55, 1.15]$ ). By  
699 comparison, in Experiment 2, attention did not significantly predict CPP amplitude ( $ps > .43$ ).  
700 A straightforward implication of these findings is that they provide further evidence that  
701 participants' attention ratings do not simply reflect the strength of their perceptual  
702 experience. The specific, detailed pattern is more complex to explain. The quadratic  
703 relationship apparent in Experiment 1 would be predicted if CPP amplitude reflected the  
704 strength of evidence needed for a participant to decide that a target was present in a  
705 particular trial, given higher baseline evidence at intermediate levels of alpha (as suggested  
706 by the ERP results) and a fixed response criterion (as suggested by our SDT analysis).  
707 However, we would expect a similar relationship to hold in Experiment 2. The contrast  
708 across experiments suggests that the nature of the decision made by participants influenced  
709 the CPP, which would be consistent with this component indexing a high-level, decision-  
710 related process, a possibility that we explored in a final analysis.  
711

*Experiment 1 (Confidence and Attention)*

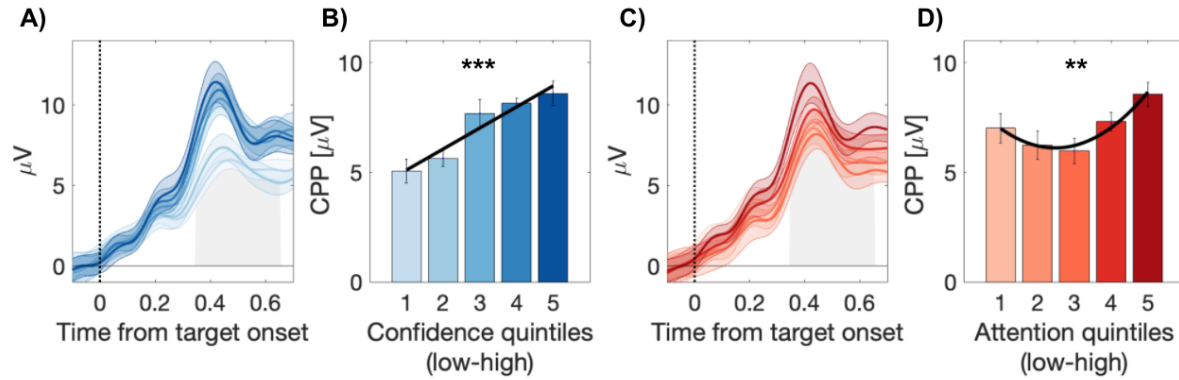

*Experiment 2 (Visibility and Attention)*

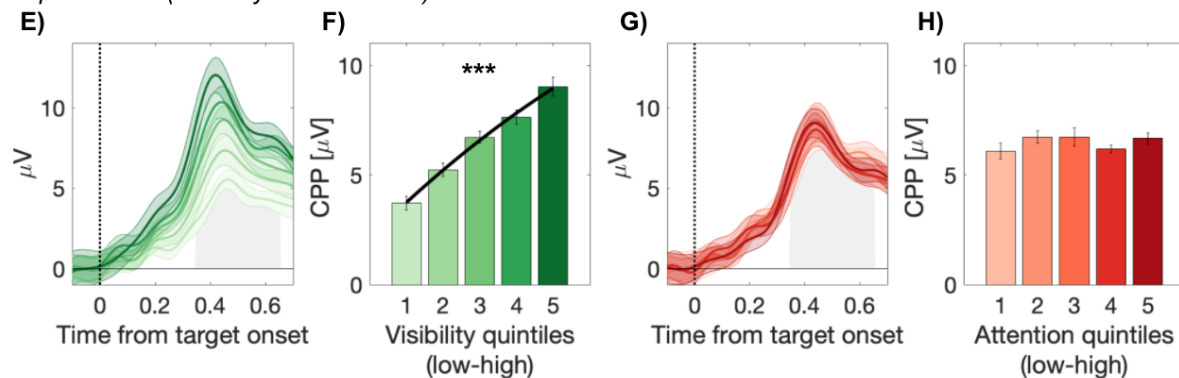

712  
713  
714  
715  
716  
717  
718

**Figure 8. The subjective correlates of the centro-parietal positivity.** CPP amplitude increases with reported confidence (A-B), and visibility (E-F), in Experiments 1 and 2, respectively. CPP amplitude also varied as a function of subjectively rated attention in Experiment 1 (C-D), but not in Experiment 2 (G-H). Grey shaded regions note 250-550 ms relative to target-onset, used to calculate the CPP.

719 **Subjective attention mediates the relationship between CPP amplitude and**  
720 **confidence, but not visibility**

721 The preceding analyses suggest a complex relationship between prestimulus alpha  
722 and decision-related neural activity that is dependent on the decisions and ratings that  
723 participants are asked to make. To investigate this dependence further, we performed a  
724 mediation analysis using the mediation toolbox (Wager, 2020). The central idea of a  
725 mediation analysis is to determine whether the linear relationship between a predictor and  
726 outcome variable can be explained by an intermediate variable (Baron & Kenny, 1986). In  
727 our data, we have observed that attention and confidence ratings positively correlated in  
728 Experiment 1, when the relationship between alpha power, attention ratings and CPP  
729 amplitude was strongest. By contrast, in Experiment 2, in which the relationship between  
730 alpha power and subjective attention was weaker, there was also no significant correlation  
731 between CPP amplitude and attention ratings, or between visibility and attention ratings. We  
732 thus hypothesised that subjective attention ratings were acting as a mediator between CPP  
733 amplitude and confidence, but not between CPP and visibility ratings, and formally tested for  
734 this relationship with our mediation analysis (see Methods). We note that testing quadratic  
735 terms is not yet supported by the mediation toolbox, so we have focused on the linear  
736 relationships linking CPP amplitudes and subjective ratings. By including attention reports as



737 a mediator, we do not mean to imply that CPP amplitude causally influences attention, or  
738 that attention causally influences confidence/visibility, but aim simply to capture whether the  
739 strength of the linear relationship between CPP amplitude and confidence or visibility is  
740 affected by self-reported attention.

741

742 Figure 9 displays the results of our analysis. Consistent with our earlier analyses, in  
743 Experiment 1, attention ratings were positively associated with CPP amplitude (path *a*  
744 controlling for confidence and alpha power;  $\beta = .01$ , SE = 0.002;  $p = .002$ ), and positively  
745 associated with confidence (path *b* controlling for CPP amplitude and alpha power;  $\beta = 0.19$ ,  
746 SE = 0.03;  $p < .001$ ). Importantly, the meditation effect was also significant (path *a\*b*;  $\beta =$   
747 0.008, SE = 0.004;  $p < .001$ ), demonstrating that the inclusion of attention ratings as a  
748 mediator accounts for a significant amount of the relationship between CPP amplitude and  
749 confidence ratings. In contrast, in Experiment 2, neither the *a* or *b* paths linking attention to  
750 CPP amplitude and visibility, were significant ( $ps > .07$ ). As a result, the mediation analysis  
751 has extended our initial results by demonstrating that a significant portion of the relationship  
752 between CPP amplitude and confidence is accounted for by subjective attention ratings, yet  
753 subjective attention ratings do not mediate the relationship between CPP amplitude and  
754 visibility. We interpret this effect as an indication that people are able to distinguish the  
755 strength of sensory evidence from their attentional state, when reporting visibility, but  
756 combine sensory evidence and attention state when they report their confidence in their  
757 perceptions.

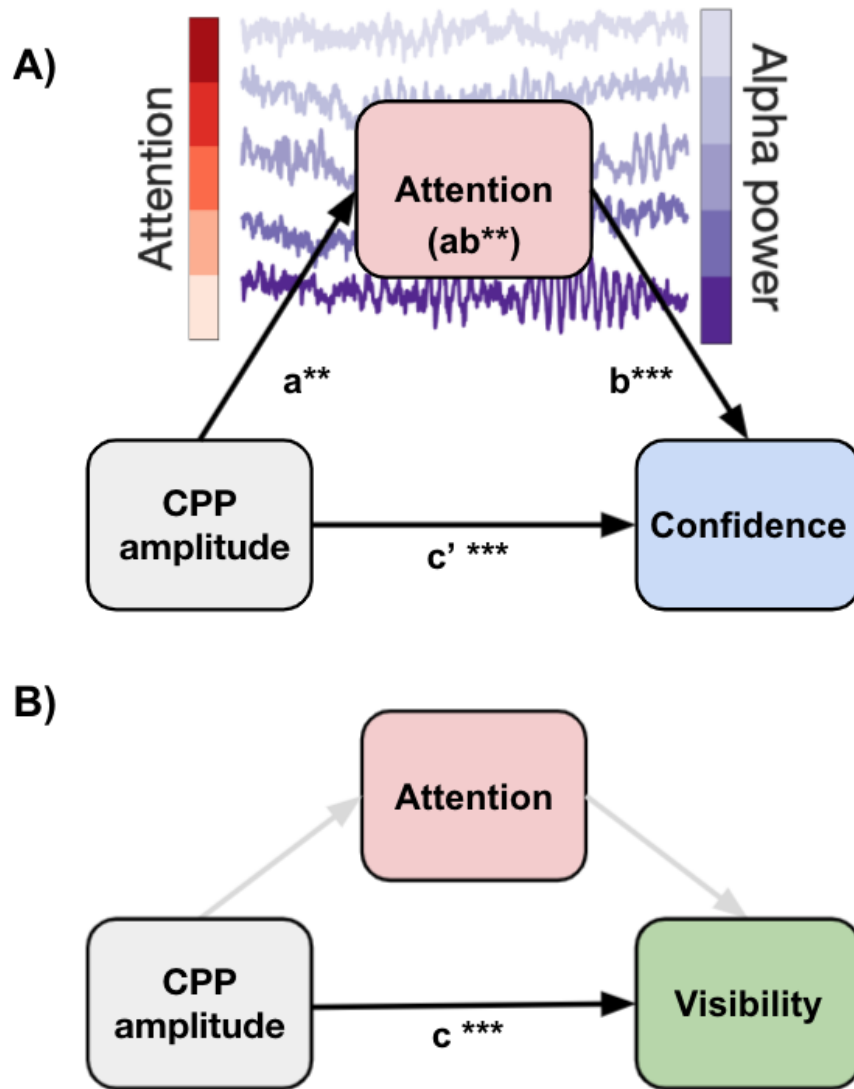

758

759

760 **Figure 9. Mediation path diagram and results using single trial estimates of CPP**

761 **amplitude, subjective attention, confidence and visibility ratings.** A) In Experiment 1,

762 when the relationship between alpha power and attention ratings was strongest, CPP

763 amplitude (path a; controlling for Confidence), and Confidence ratings (path b; controlling for

764 CPP amplitude) were positively associated with attention. The mediation effect (path  $a*b$ ), is

765 significant, showing that attention ratings affect the relationship between CPP amplitude and

766 confidence. B) In Experiment 2, the direct effect between CPP amplitude and visibility was

767 significant, but paths a and b were not significant, indicating Attention did not mediate the

768 relationship between CPP amplitude and visibility ratings.  $**p < .01$ ,  $***p < .001$ .

769

## Discussion

770

771 This study aimed to characterise the relationship between prestimulus alpha power and  
772 subjective ratings of attention, confidence and stimulus visibility, and thereby provide insight  
773 into the basis of these introspective judgments. Previous work, focusing mainly on visual  
774 discrimination tasks, has demonstrated a negative linear relationship linking prestimulus  
775 alpha power to all three of these subjective criteria. Here we demonstrate that in a visual  
776 detection task, prestimulus alpha power does negatively correlate with subjectively rated  
777 attention, but that it quadratically modulates decision confidence and visibility. In support of  
778 this quadratic relationship, we also found that alpha power quadratically modulates objective  
779 performance, as well as the amplitude of event-related potentials elicited by task stimuli.  
780 Importantly, we outline the neural commonalities and dissociations of these overlapping  
781 subjective criteria.

### 782 **Prestimulus alpha power and subjective reports**

783 Given the natural correlation between cortical excitability, attention, and subjective  
784 judgements of visibility and confidence, in many situations their inter-relationships are  
785 difficult to disentangle. The present dataset is interesting in this regard because we observe  
786 that alpha power showed a different relationship with attention ratings vs. ratings of  
787 confidence and visibility. Specifically, after splitting prestimulus alpha power into quintiles,  
788 we observed the expected negative and monotonic relationship between alpha power and  
789 subjectively-rated attention, but found that intermediate levels of alpha power corresponded  
790 to the highest subjective ratings of decision confidence and visibility. Intermediate alpha  
791 power was also associated with increased accuracy, as well as increased amplitude of early  
792 (P1), and late (CPP) sensory evoked potentials.

793 This inverted-U function is in contrast to recent examples of a negative and linear  
794 relationship between prestimulus alpha power and various performance measures in  
795 discrimination tasks (Benwell et al., 2017; Iemi et al., 2017; Samaha et al., 2017). Our aim  
796 here was not to explore the mechanisms underpinning this quadratic relationship: Rather,  
797 observing this effect gave us the opportunity to dissociate measures – of attentional state,  
798 evoked responses, task performance, and performance evaluations – that are typically  
799 mutually correlated. However, it is interesting to ask what may drive such a quadratic  
800 association. A quadratic link between prestimulus oscillatory power and performance has  
801 previously been reported in somatosensory detection tasks (Linkenkaer-Hansen et al., 2004;  
802 Zhang & Ding, 2010), and between alpha power and the amplitude of early visually evoked  
803 potentials (Rajagovindan & Ding, 2011). In their model, Rajagovindan and Ding (2011)  
804 proposed that the total output of a neural ensemble can be characterized by its position on a  
805 sigmoidal curve, with each point on the curve being jointly determined by background  
806 synaptic activity and the addition of a sensory evoked response (see Rajagovindan & Ding,  
807 2011, for details). Their model predicts maximal sensory-evoked output at intermediate  
808 levels of alpha power, where the sigmoidal curve is steepest, and was supported by  
809 measuring the amplitude of the P1 response at attended, compared to unattended locations.  
810 Our visual detection tasks differ in many important ways, yet we also find that early visual  
811 evoked responses in the P1 window are quadratically modulated by prestimulus alpha  
812 power. As an extension of these results, here we can add that subjective visibility and  
813 confidence are also greatest at intermediate levels of alpha power. Interestingly, in all cases,

814 increased confidence/visibility that a target was present was associated with intermediate  
815 alpha power, even on exclusively target-absent trials (**Figure 5A-C**). Thus the relationship  
816 between prestimulus alpha power and decision confidence appears to be directional:  
817 Intermediate power does not enhance confidence in any decision, but enhances confidence  
818 in perceiving the presence of a target, even on exclusively target-absent trials.

819  
820 The present work complements recent evidence linking the amplitude of prestimulus  
821 oscillations to the intensity of subjective reports (Samaha et al. 2020), by clarifying the role of  
822 intervening event-related potentials on measures of confidence, visibility and attention.  
823 Previous links between prestimulus power and subjective reports studied each in isolation,  
824 or omitted ERP analyses (Samaha et al. 2017; Benwell et al. 2017; Whitmarsh et al. 2021),  
825 which in the present work have revealed novel dissociations between these overlapping  
826 subjective criteria. Specifically, prestimulus alpha oscillations negatively correlate with the  
827 intensity of subjective attention on both target-present and target-absent trials, and when  
828 rating either visibility or confidence in the intervening trial window. Participants were capable  
829 of distinguishing these fluctuations in attention from the strength of sensory evidence when  
830 rating perceived target visibility, which positively correlated with the amplitude of sensory  
831 evoked responses, whereas ratings of attention did not (CPP cf. Figure 8). In contrast,  
832 confidence values incorporated both the context of attentional state and the strength of  
833 sensory evidence, as these subjective reports were positively correlated, and increased  
834 concomitantly with CPP amplitude.

835 We also observed a quadratic relationship linking alpha power to both the amplitude  
836 of event-related potentials and the strength of visibility and confidence judgements. We can  
837 now characterise the information that underpins subjective reports of attention and  
838 confidence in this way: prestimulus alpha power is negatively correlated with the intensity of  
839 subjective attention, and quadratically modulates the strength of sensory-evoked potentials.  
840 The strength of these sensory-evoked potentials, in turn, partially determine the intensity of  
841 subjective visibility and confidence - with the latter also incorporating, and correlating, with  
842 the intensity of subjective attention. In the case of the linear relationship between alpha  
843 power and attention, we were able to test for this tripartite relationship using our mediation  
844 analysis, and demonstrate that a significant mediation pathway exists linking these three  
845 outcomes. It is important to note that as variations in spontaneous alpha power partially  
846 determined CPP amplitude, our observation adds to a growing literature that the CPP  
847 represents the accumulation of decision likelihood based on internal states, which include  
848 the subjective certainty of a decision (Gherman & Philiastides, 2015; Rangelov & Mattingley,  
849 2020; Tagliabue et al., 2019), as opposed to a pure index of physical sensory evidence (e.g.  
850 O'Connell et al., 2012).

851 The inverted-U function is in contrast to recent examples of a negative and linear  
852 relationship between prestimulus alpha power and detection performance (e.g. Iemi et al.,  
853 2017) as well as confidence and visibility in 2AFC visual discrimination tasks (e.g. Benwell et  
854 al., 2017; Samaha et al., 2017). As such it is important to consider the large differences  
855 between our present and previous works which may contribute to these discrepancies. Most  
856 notably, discrimination and detection judgements may be supported by fundamentally  
857 distinct processes, and recent work has begun to describe independent behavioural (Kanai  
858 et al., 2010; Meuwese et al., 2014), as well as neural correlates (e.g. Mazor & Fleming,  
859 2020) that distinguish these judgement types. More practically, detection in the present work  
860 required identification of a single-image within an RSVP stream. As a result, decision making  
861 involved processing target signals embedded in noise, and thus integrating evidence over an

862 extended period of time. This is in stark contrast to previous examples that usually employ  
863 short duration, near threshold targets on an otherwise unchanged background (e.g. lemi et  
864 al., 2017). RSVP streams also began after a fixed interstimulus interval, and targets were  
865 predictably located at 50 ms intervals within this stream. These features change the  
866 anticipatory and predictive demands of our paradigm compared to previous work, and it is  
867 presently unclear how these differences may combine to interact with alpha power and  
868 target detection (Clayton et al., 2015, 2018; Van Diepen et al., 2019).

869

870

871

872

873

874

875

876

877

878

879

880

881

882

883

884

885

886

887

In addition to the proposed link between alpha power and perceptual performance, another non-exclusive possibility is that the phase of alpha oscillations rhythmically modulate inhibition-excitation cycles, which also determine perceptual outcomes (Chapeton et al., 2019; Jensen et al., 2012; W. Klimesch et al., 2007; Wolfgang Klimesch, 2012; Mathewson et al., 2012; Mazaheri & Jensen, 2010). For example, it has previously been reported that the phase of prestimulus alpha oscillations can determine whether near-threshold targets are detected (Busch et al., 2009; Mathewson et al., 2009). Moreover, the phase of spontaneous alpha can be adjusted under top-down control, in anticipation of stimulus onset (Samaha et al., 2015); yet see van Diepen et al., 2015). To our knowledge, however, whether subjective estimates, such as confidence, visibility, or attention are also modulated by anticipatory phase have not been reported. Although it is beyond the scope of the present manuscript, it was clear in our dataset that subjective confidence and the visibility of a target were systematically biased by prestimulus alpha phase, while attention was not (Supplementary Figure 4). Future work will be necessary to untangle these complex relationships, and further determine how the phase of prestimulus alpha may similarly mediate sensory-evoked potentials.

## 888 **The relationship between attention, confidence, and visibility ratings**

889

890

891

892

893

894

895

896

897

898

899

900

901

902

903

904

905

906

907

Our findings provide new insight into the relationship between introspective reports of attention and sensory experience. Although attention and confidence have traditionally been studied in isolation, recent research has begun to expand our understanding of their relationship. Predominantly, this has been achieved by contrasting confidence between attended and unattended conditions. For example, when spatial attention is validly cued toward a target location, subjective confidence increases in discrimination tasks compared to confidence at unattended, or invalidly cued locations (Kurtz et al., 2017; Zizlsperger et al., 2012, 2014); yet see (Wilimzig et al., 2008), for the opposite effect). As a complement to these effects of cued attention, here we show that increased subjective attentional engagement in a task is also associated with increases in confidence in a graded manner. The intensity of attention also increased both objective performance accuracy, and metacognitive sensitivity in our paradigm. As a consequence, our results speak to the value of monitoring subjective attentional demand in perceptual research because even matched conditions, if differing in perceived attentional effort, will result in significant differences to both subjective and objective performance.

The incorporation of attention-related information may improve perceptual decisions by reducing uncertainty (Denison et al., 2018), or alternatively, by boosting confidence due to an apparent increase in stimulus contrast (Carrasco et al., 2004). Indeed, perceptual confidence has been tightly yoked to the amount of sensory information that is available in

908 favour of a decision (for review; Mamassian, 2016). In this regard, the effects of attention are  
909 reminiscent of the near-ubiquitous effect of objective task difficulty on confidence, whereby  
910 easier tasks are associated with greater confidence in correct responses and reduced  
911 confidence in errors, and therefore an overall increase in metacognitive sensitivity (Kepecs &  
912 Mainen, 2012; Maniscalco & Lau, 2012). However, our results suggest that attention does  
913 not only affect confidence indirectly via changes in signal quality. If so, we might not expect  
914 significant effects of attention on decision confidence in the absence of a target (which were  
915 clearly apparent in Experiment 1), and we would expect similarly strong effects of attention  
916 on visibility judgments (which were not observed in Experiment 2).

917 Instead, confidence reports appear to integrate information about attentional state  
918 more directly such that, above and beyond any effects of attention on signal quality, people  
919 experience or express higher confidence in decisions they make when focused on (vs.  
920 distracted from) the task at hand. Thus, confidence correlates strongly with attention, more  
921 so than visibility ratings, and in a manner that can be normatively justified: Intuitively, one  
922 should place less trust in a given perceptual impression (whether of presence or absence of  
923 a target) when it is derived from an inattentive glimpse than from careful focused viewing.  
924 This interpretation is consistent with other recent suggestions that confidence is not a direct  
925 readout of accumulated evidence strength, but instead integrates relevant contextual  
926 information (Boldt et al. 2017; Kiani et al. 2014; Bang et al. 2017). Such a two-stage model  
927 of confidence formation (cf. Shekhar and Rahnev 2018) is in contrast to earlier proposals  
928 that confidence directly reflects the strength of accumulated evidence (for reviews; Pleskac  
929 & Busemeyer, 2010; Yeung & Summerfield, 2012) but aligns with other evidence that  
930 confidence can be manipulated without a change in sensory evidence (e.g. Cortese et al.,  
931 2016, 2017). This higher-order influence on decisions (see Mazor et al., 2020; Denison et  
932 al., 2018 for related discussions), may have been exacerbated in our task paradigm, as  
933 responses were not speeded, allowing sufficient time for reflection and adjustment of  
934 subjective ratings between the RSVP stream and response options. Future work will be  
935 necessary to test whether reduced stimulus-response intervals mediate the correlation  
936 between target-absent confidence and attention ratings.

937 This correlation between attention and confidence notwithstanding, the two ratings  
938 showed clear dissociations: Confidence showed a linear relationship with the strength of  
939 sensory evidence as reflected in sensory evoked potentials but varied quadratically as a  
940 function of prestimulus alpha power, whereas attention ratings showed the opposite pattern.  
941 More broadly, we found little evidence that attention ratings are inferred indirectly from the  
942 strength of perceptual evidence accumulated for a decision (“I saw a target clearly so I  
943 must’ve been paying attention”, cf. Head & Helton, 2018), and instead they seem to depend  
944 on more direct insight into the true underlying attentional state (as it is reflected in alpha  
945 power, for example). This insight might come from monitoring the state of sensory systems  
946 themselves, but perhaps more plausibly derives from access to one’s current level of  
947 motivation and effort expended on the task (i.e., information about the strength of exerted  
948 attention and control). That said, a nuance of the present results was that participants’  
949 attention ratings differed subtly across experiments, for example showing a stronger  
950 relationship with CPP amplitude in Experiment 1 than Experiment 2. One possibility is that  
951 the specific wording used for the visibility question in Experiment 2 (“How much of the target  
952 did you see?”) may have primed a quantitative, as opposed to qualitative use of the visibility  
953 scale, and encouraged participants to distinguish their sensory experience from subjective  
954 level of engagement in the task. In contrast, the experiential focus of the confidence question  
955 (“How confident are you?”) may have led participants to base their attention ratings more on

956 experiential cues such as the strength of their perceptions (e.g., it would be counterintuitive  
957 to indicate you were sure a target was present/absent even though you had been paying  
958 little attention to the task). Although speculative, this possibility can easily be tested in future  
959 research, by adapting the visibility prompt to instead include a qualitative estimate of  
960 perceptual awareness that is a standard in consciousness research (e.g. “How clear was  
961 your visual experience?”; see Overgaard & Sandberg, 2012; Ramsøy & Overgaard, 2004;  
962 Sandberg et al., 2010).  
963  
964

## 965 **Conclusion**

966 Our study sheds new light on the interaction between prestimulus alpha power and  
967 subjective phenomena in an RSVP target detection task. Alpha power negatively and linearly  
968 correlated with the intensity of subjective attention, yet quadratically modulated the strength  
969 of decision confidence and visibility. This partial independence speaks to the importance of  
970 choosing appropriate subjective response options in experimental tasks, and for future  
971 studies of metacognition, suggesting that confidence reports (but not visibility) may conflate  
972 attentional state ratings. Importantly, understanding the influence of alpha on subjective  
973 criteria can be enriched by considering the intervening effect of alpha on stimulus-evoked  
974 responses. We show that people are able to distinguish and separately report their sensory  
975 experience (here: stimulus visibility) and their attentional state, with the former reflected in  
976 sensory-evoked potentials and the latter in prestimulus alpha oscillations. But they appear to  
977 combine these signals when they report the reliability of their perceptions as reflected in the  
978 confidence they express in their decisions. Collectively, these findings provide insight into  
979 the commonalities and dissociations among different subjective reports in their psychological  
980 properties and neural underpinnings.

981 **Supplementary Methods**

982 For our phase based analysis, our analysis focused on whether subjective criteria  
983 varied as a function of prestimulus alpha phase angle. For this analysis, we calculated  
984 complex-values using our FFT transform, as described above, and now retained the single-  
985 trial phase angles. For each participant, we next split the single trial phase angles into 11  
986 phase bins, and averaged the subjective criteria of interest within each bin. As the objective  
987 preferred phase angle can vary across individuals, we first centred on each individual's  
988 preferred phase angle, based on the maximum subjective criteria, before averaging across  
989 subjects. As in previous uses of this analysis (e.g. Busch et al., 2010), a peak at the  
990 preferred phase angle is trivial, as a result of this realignment. A significant effect of phase  
991 on subjective criteria can only be inferred after omitting this central phase bin, and was  
992 tested for using repeated-measures ANOVA.



993 **Supplementary Figures**

994

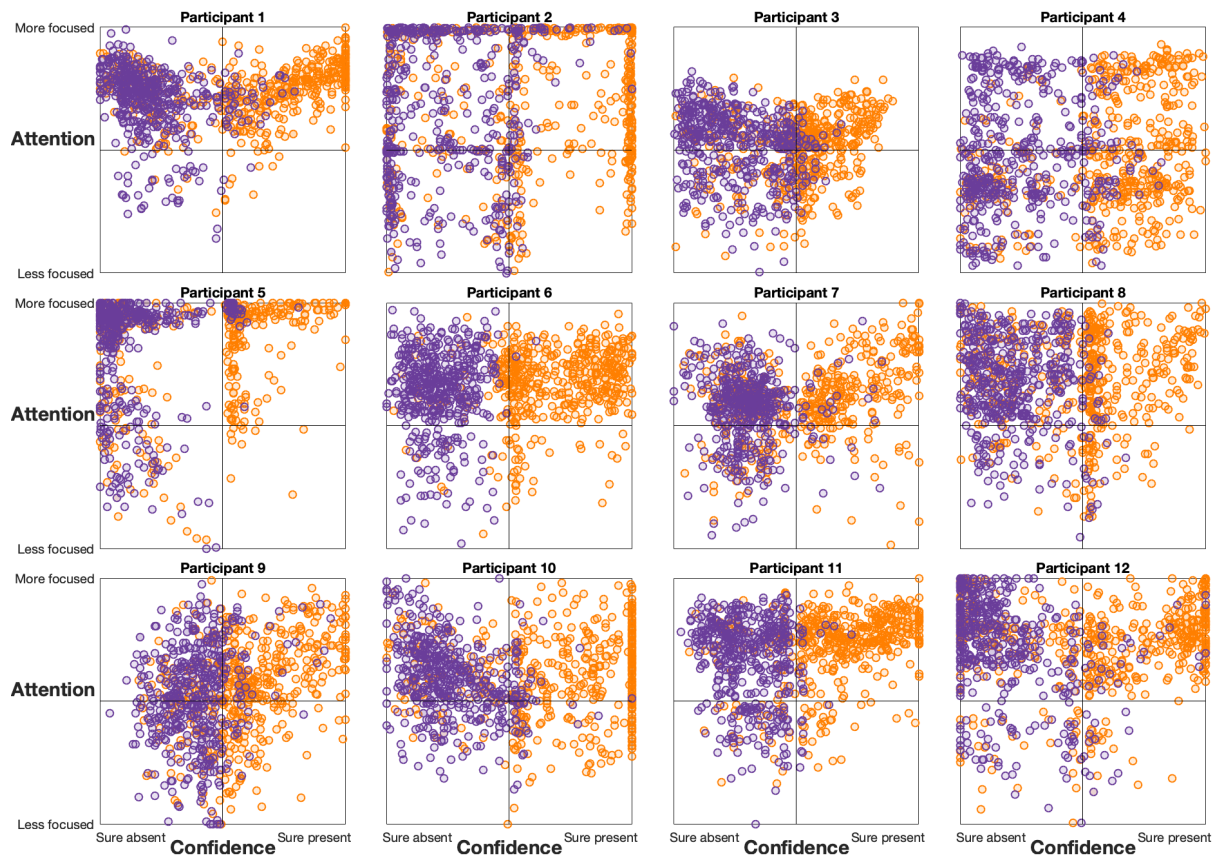

995

996 **Supplementary Figure 1. Behavioural responses for participants in Experiment 1.**

997

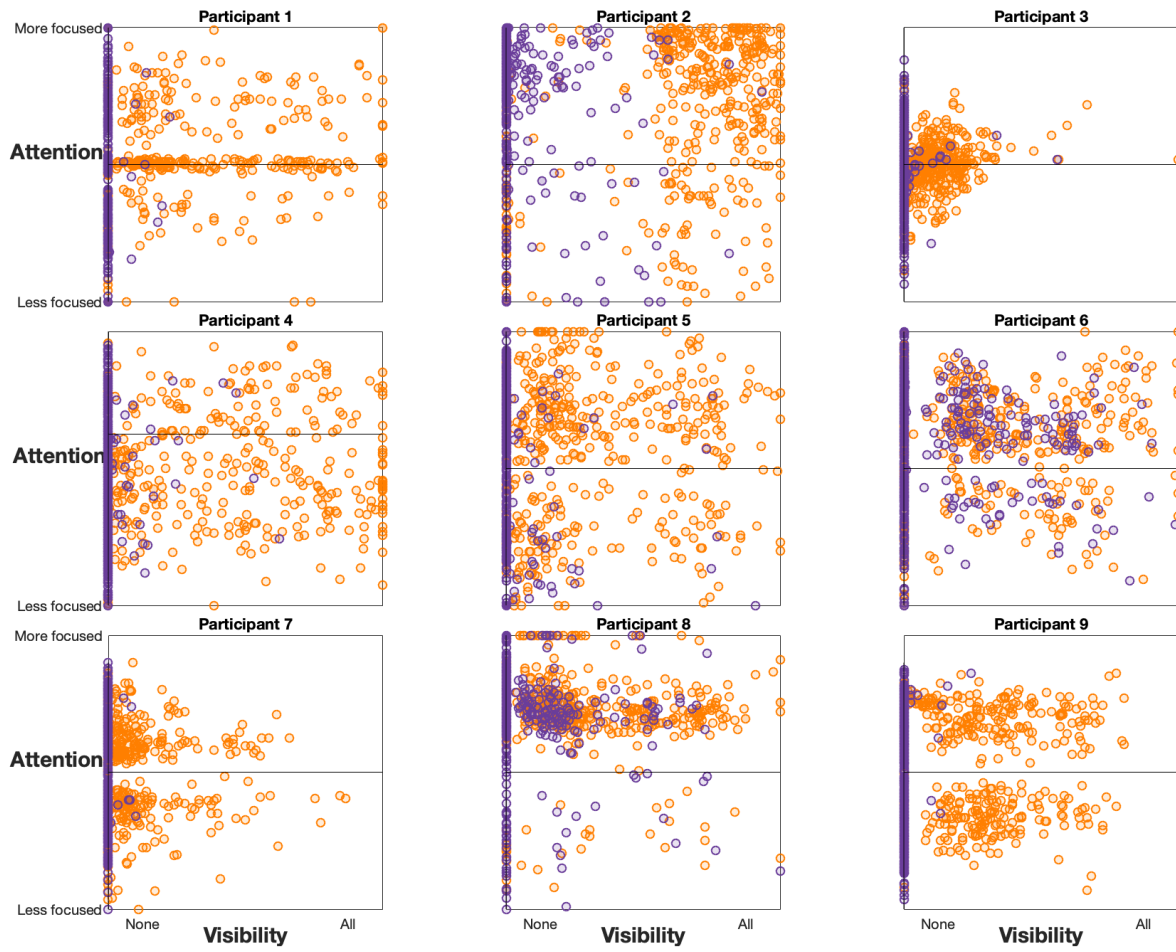

998

999

**Supplementary Figure 2. Behavioural responses for participants in Experiment 2.**

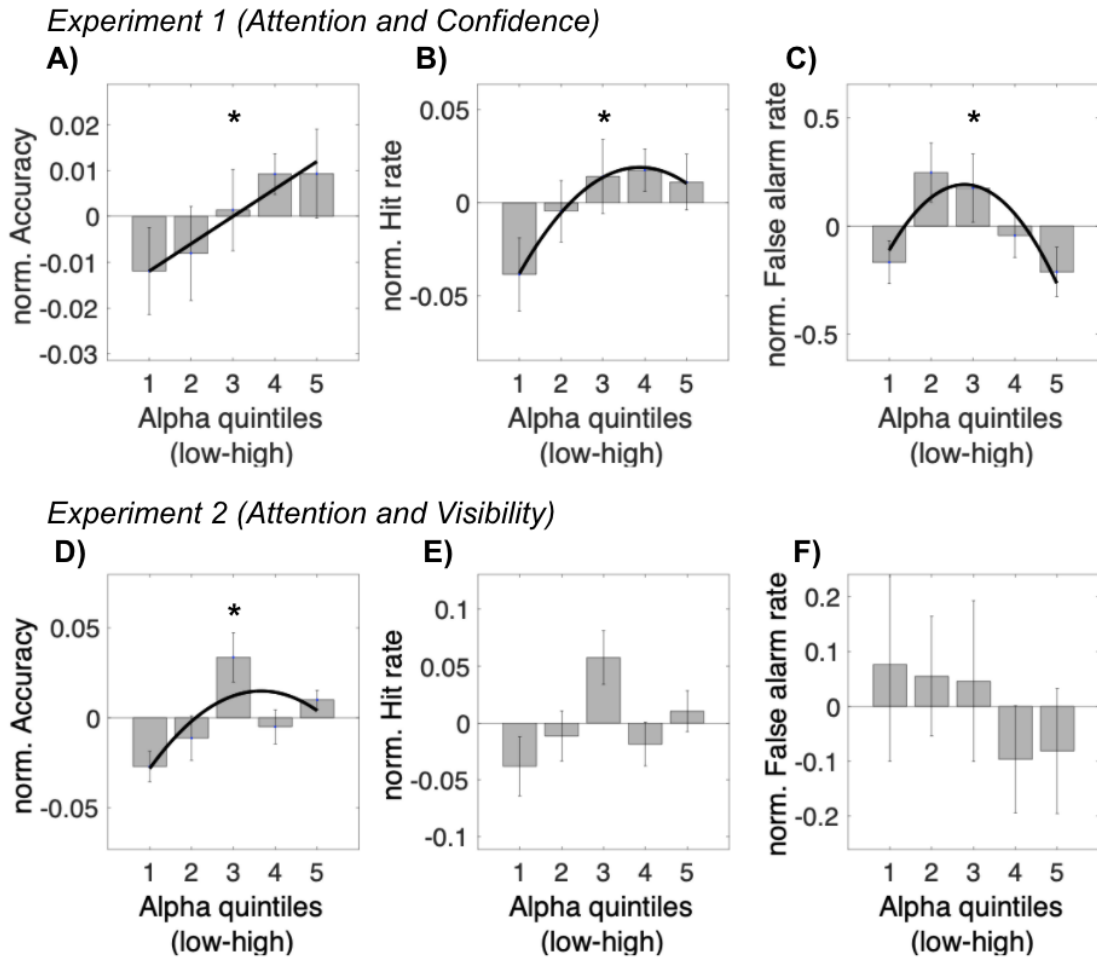

1000  
1001  
1002  
1003

**Supplementary Figure 3. Alpha power and objective performance in separate experiments.**

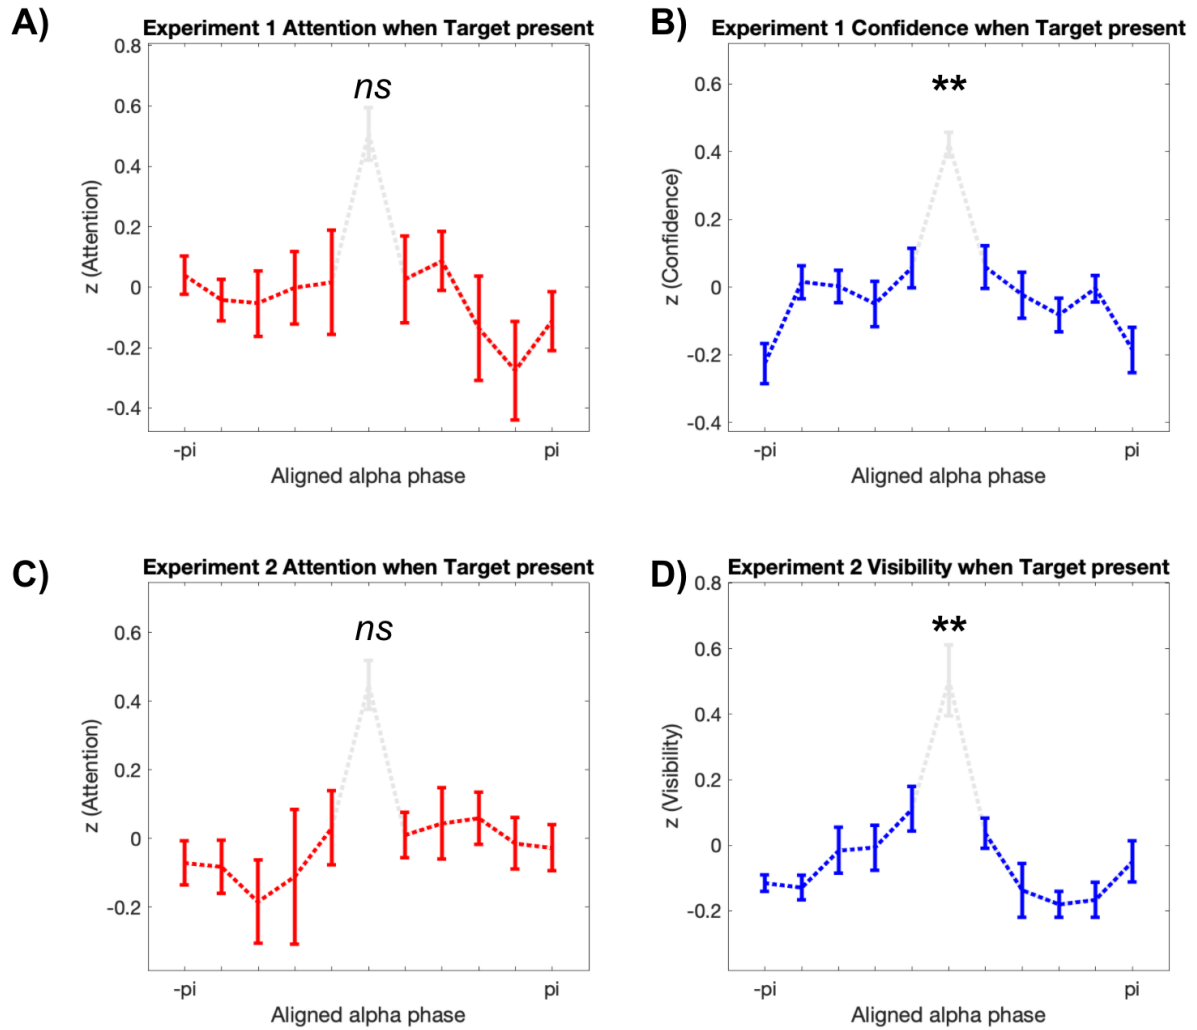

1004  
1005  
1006  
1007  
1008  
1009  
1010  
1011

**Supplementary Figure 4. The relationship between prestimulus alpha phase at Oz, attention, confidence and visibility, on target-present trials.** A,B) In Experiment 1, only decision confidence varied with prestimulus alpha phase (Attention:  $F(4,44) = 1.43, p = .24$ ; Confidence:  $F(4,44) = 4.24, p = .005$ ). C,D) In Experiment 2, only target visibility varied with prestimulus alpha phase (Attention:  $F(4,32) = 0.26, p = .9$ ; Visibility:  $F(4,32) = 4.29, p = .007$ ). ns= not significant, \*\*  $p < .01$ .

## References

- 1012
- 1013 Ais, J., Zylberberg, A., Barttfeld, P., & Sigman, M. (2016). Individual consistency in the  
1014 accuracy and distribution of confidence judgments. *Cognition*, *146*, 377–386.
- 1015 Babiloni, C., Vecchio, F., Bultrini, A., Luca Romani, G., & Rossini, P. M. (2006). Pre- and  
1016 poststimulus alpha rhythms are related to conscious visual perception: a high-resolution  
1017 EEG study. *Cerebral Cortex*, *16*(12), 1690–1700.
- 1018 Bang, D., Aitchison, L., Moran, R., Herce Castanon, S., Rafiee, B., Mahmoodi, A., Lau, J. Y.  
1019 F., Latham, P. E., Bahrami, B., & Summerfield, C. (2017). Confidence matching in group  
1020 decision-making. *Nature Human Behaviour*, *1*(6), 1–7.
- 1021 Barron, E., Riby, L. M., Greer, J., & Smallwood, J. (2011). Absorbed in thought: the effect of  
1022 mind wandering on the processing of relevant and irrelevant events. *Psychological  
1023 Science*, *22*(5), 596–601.
- 1024 Becker, R., Reinacher, M., Freyer, F., Villringer, A., & Ritter, P. (2011). How Ongoing  
1025 Neuronal Oscillations Account for Evoked fMRI Variability. *Journal of Neuroscience*.  
1026 <https://doi.org/10.1523/JNEUROSCI.0210-11.2011>
- 1027 Benwell, C. S. Y., Tagliabue, C. F., Veniero, D., Cecere, R., Savazzi, S., & Thut, G. (2017).  
1028 Prestimulus EEG power predicts conscious awareness but not objective visual  
1029 performance. *eNeuro*, *4*(6). <https://doi.org/10.1523/ENEURO.0182-17.2017>
- 1030 Berger, H. (1929). Über das elektroencephalogramm des menschen. *European Archives of  
1031 Psychiatry and Clinical Neuroscience*, *87*(1), 527–570.
- 1032 Boldt, A., de Gardelle, V., & Yeung, N. (2017). The impact of evidence reliability on  
1033 sensitivity and bias in decision confidence. *Journal of Experimental Psychology. Human  
1034 Perception and Performance*, *43*(8), 1520–1531.
- 1035 Busch, N. A., Dubois, J., & VanRullen, R. (2009). The phase of ongoing EEG oscillations  
1036 predicts visual perception. *The Journal of Neuroscience: The Official Journal of the  
1037 Society for Neuroscience*, *29*(24), 7869–7876.
- 1038 Carrasco, M., Ling, S., & Read, S. (2004). Attention alters appearance. *Nature  
1039 Neuroscience*, *7*(3), 308–313.

- 1040 Chapeton, J. I., Haque, R., Wittig, J. H., Jr, Inati, S. K., & Zaghloul, K. A. (2019). Large-Scale  
1041 Communication in the Human Brain Is Rhythmically Modulated through Alpha  
1042 Coherence. *Current Biology: CB*, 29(17), 2801–2811.e5.
- 1043 Chaumon, M., & Busch, N. A. (2014). Prestimulus neural oscillations inhibit visual perception  
1044 via modulation of response gain. *Journal of Cognitive Neuroscience*, 26(11), 2514–  
1045 2529.
- 1046 Clayton, M. S., Yeung, N., & Cohen Kadosh, R. (2015). The roles of cortical oscillations in  
1047 sustained attention. *Trends in Cognitive Sciences*, 19(4), 188–195.
- 1048 Clayton, M. S., Yeung, N., & Cohen Kadosh, R. (2018). The many characters of visual alpha  
1049 oscillations. *The European Journal of Neuroscience*, 48(7), 2498–2508.
- 1050 Coon, W. G., Gunduz, A., Brunner, P., Ritaccio, A. L., Pesaran, B., & Schalk, G. (2016).  
1051 Oscillatory phase modulates the timing of neuronal activations and resulting behavior.  
1052 *NeuroImage*, 133, 294–301.
- 1053 Cortese, A., Amano, K., Koizumi, A., Kawato, M., & Lau, H. (2016). Multivoxel  
1054 neurofeedback selectively modulates confidence without changing perceptual  
1055 performance. *Nature Communications*, 7, 13669.
- 1056 Cortese, A., Amano, K., Koizumi, A., Lau, H., & Kawato, M. (2017). Decoded fMRI  
1057 neurofeedback can induce bidirectional confidence changes within single participants.  
1058 *NeuroImage*, 149, 323–337.
- 1059 Denison, R. N., Adler, W. T., Carrasco, M., & Ma, W. J. (2018). Humans incorporate  
1060 attention-dependent uncertainty into perceptual decisions and confidence. *Proceedings*  
1061 *of the National Academy of Sciences of the United States of America*, 115(43), 11090–  
1062 11095.
- 1063 Ergenoglu, T., Demiralp, T., Bayraktaroglu, Z., Ergen, M., Beydagi, H., & Uresin, Y. (2004).  
1064 Alpha rhythm of the EEG modulates visual detection performance in humans. *Brain*  
1065 *Research. Cognitive Brain Research*, 20(3), 376–383.
- 1066 Fleming, S. M., & Frith, C. D. (2014). *The Cognitive Neuroscience of Metacognition* (S. M.  
1067 Fleming & C. D. Frith (eds.)). Springer, Berlin, Heidelberg.

- 1068 Gherman, S., & Philiastides, M. G. (2015). Neural representations of confidence emerge  
1069 from the process of decision formation during perceptual choices. *NeuroImage*, *106*,  
1070 134–143.
- 1071 Gould, I. C., Rushworth, M. F., & Nobre, A. C. (2011). Indexing the graded allocation of  
1072 visuospatial attention using anticipatory alpha oscillations. *Journal of Neurophysiology*,  
1073 *105*(3), 1318–1326.
- 1074 Hanslmayr, S., Klimesch, W., Sauseng, P., Gruber, W., Doppelmayr, M., Freunberger, R., &  
1075 Pecherstorfer, T. (2005). Visual discrimination performance is related to decreased  
1076 alpha amplitude but increased phase locking. *Neuroscience Letters*, *375*(1), 64–68.
- 1077 Hanslmayr, S., Klimesch, W., Sauseng, P., Gruber, W., Doppelmayr, M., Freunberger, R.,  
1078 Pecherstorfer, T., & Birbaumer, N. (2007). Alpha phase reset contributes to the  
1079 generation of ERPs. *Cerebral Cortex*, *17*(1), 1–8.
- 1080 Head, J., & Helton, W. S. (2018). The troubling science of neurophenomenology.  
1081 *Experimental Brain Research. Experimentelle Hirnforschung. Experimentation*  
1082 *Cerebrale*, *236*(9), 2463–2467.
- 1083 Iemi, L., & Busch, N. A. (2018). Moment-to-Moment Fluctuations in Neuronal Excitability  
1084 Bias Subjective Perception Rather than Strategic Decision-Making. *eNeuro*,  
1085 *ENEURO.043*(3). <https://doi.org/10.1523/ENEURO.0430-17.2018>
- 1086 Iemi, L., Busch, N. A., Laudini, A., Haegens, S., Samaha, J., Villringer, A., & Nikulin, V. V.  
1087 (2019). Multiple mechanisms link prestimulus neural oscillations to sensory responses.  
1088 *eLife*, *8*. <https://doi.org/10.7554/eLife.43620>
- 1089 Iemi, L., Chaumon, M., Crouzet, S. M., & Busch, N. A. (2017). Spontaneous neural  
1090 oscillations bias perception by modulating baseline excitability. *The Journal of*  
1091 *Neuroscience: The Official Journal of the Society for Neuroscience*, *37*(4), 807–819.
- 1092 Jensen, O., Bonnefond, M., & VanRullen, R. (2012). An oscillatory mechanism for prioritizing  
1093 salient unattended stimuli. *Trends in Cognitive Sciences*, *16*(4), 200–206.
- 1094 Kanai, R., Walsh, V., & Tseng, C.-H. (2010). Subjective discriminability of invisibility: a  
1095 framework for distinguishing perceptual and attentional failures of awareness.

- 1096 *Consciousness and Cognition*, 19(4), 1045–1057.
- 1097 Kepecs, A., & Mainen, Z. F. (2012). A computational framework for the study of confidence  
1098 in humans and animals. *Philosophical Transactions of the Royal Society of London.*  
1099 *Series B, Biological Sciences*, 367(1594), 1322–1337.
- 1100 Kiani, R., Corthell, L., & Shadlen, M. N. (2014). Choice certainty is informed by both  
1101 evidence and decision time. *Neuron*, 84(6), 1329–1342.
- 1102 Kizuk, S. A. D., & Mathewson, K. E. (2017). Power and Phase of Alpha Oscillations Reveal  
1103 an Interaction between Spatial and Temporal Visual Attention. *Journal of Cognitive*  
1104 *Neuroscience*, 29(3), 480–494.
- 1105 Klimesch, W. (2012).  $\alpha$ -band oscillations, attention, and controlled access to stored  
1106 information. *Trends in Cognitive Sciences*, 16(12), 606–617.
- 1107 Klimesch, W., Sauseng, P., & Hanslmayr, S. (2007). EEG alpha oscillations: the inhibition–  
1108 timing hypothesis. *Brain Research Reviews*.  
1109 <https://www.sciencedirect.com/science/article/pii/S016501730600083X>
- 1110 Kurtz, P., Shapcott, K. A., Kaiser, J., Schmiedt, J. T., & Schmid, M. C. (2017). The influence  
1111 of endogenous and exogenous spatial attention on decision confidence. *Scientific*  
1112 *Reports*, 7(1), 6431.
- 1113 Limbach, K., & Corballis, P. M. (2016). Prestimulus alpha power influences response  
1114 criterion in a detection task. *Psychophysiology*, 53(8), 1154–1164.
- 1115 Linkenkaer-Hansen, K., Nikulin, V. V., Palva, S., Ilmoniemi, R. J., & Palva, J. M. (2004).  
1116 Prestimulus oscillations enhance psychophysical performance in humans. *The Journal*  
1117 *of Neuroscience: The Official Journal of the Society for Neuroscience*, 24(45), 10186–  
1118 10190.
- 1119 Macdonald, J. S. P., Mathan, S., & Yeung, N. (2011). Trial-by-Trial Variations in Subjective  
1120 Attentional State are Reflected in Ongoing Prestimulus EEG Alpha Oscillations.  
1121 *Frontiers in Psychology*, 2(MAY), 1–16.
- 1122 Mamassian, P. (2016). Visual Confidence. *Annual Review of Vision Science*, 2, 459–481.
- 1123 Maniscalco, B., & Lau, H. (2012). A signal detection theoretic approach for estimating



- 1124 metacognitive sensitivity from confidence ratings. *Consciousness and Cognition*, 21(1),  
1125 422–430.
- 1126 Mathewson, K. E., Gratton, G., Fabiani, M., Beck, D. M., & Ro, T. (2009). To see or not to  
1127 see: prestimulus alpha phase predicts visual awareness. *The Journal of Neuroscience:*  
1128 *The Official Journal of the Society for Neuroscience*, 29(9), 2725–2732.
- 1129 Mathewson, K. E., Prudhomme, C., Fabiani, M., Beck, D. M., Lleras, A., & Gratton, G.  
1130 (2012). Making waves in the stream of consciousness: entraining oscillations in EEG  
1131 alpha and fluctuations in visual awareness with rhythmic visual stimulation. *Journal of*  
1132 *Cognitive Neuroscience*, 24(12), 2321–2333.
- 1133 Mazaheri, A., & Jensen, O. (2010). Rhythmic pulsing: linking ongoing brain activity with  
1134 evoked responses. *Frontiers in Human Neuroscience*, 4, 177.
- 1135 Mazor, M., Friston, K. J., & Fleming, S. M. (2020). Distinct neural contributions to  
1136 metacognition for detecting, but not discriminating visual stimuli. *eLife*, 9, e53900.
- 1137 Meuwese, J. D. I., van Loon, A. M., Lamme, V. A. F., & Fahrenfort, J. J. (2014). The  
1138 subjective experience of object recognition: comparing metacognition for object  
1139 detection and object categorization. *Attention, Perception & Psychophysics*, 76(4),  
1140 1057–1068.
- 1141 Min, B.-K., Busch, N. A., Debener, S., Kranczioch, C., Hanslmayr, S., Engel, A. K., &  
1142 Herrmann, C. S. (2007). The best of both worlds: phase-reset of human EEG alpha  
1143 activity and additive power contribute to ERP generation. *International Journal of*  
1144 *Psychophysiology: Official Journal of the International Organization of*  
1145 *Psychophysiology*, 65(1), 58–68.
- 1146 Murphy, P. R., Robertson, I. H., Harty, S., & O'Connell, R. G. (2015). Neural evidence  
1147 accumulation persists after choice to inform metacognitive judgments. *eLife*, 4.  
1148 <https://doi.org/10.7554/eLife.11946>
- 1149 O'Connell, R. G., Dockree, P. M., & Kelly, S. P. (2012). A supramodal accumulation-to-  
1150 bound signal that determines perceptual decisions in humans. *Nature Neuroscience*,  
1151 15(12), 1729–1735.

- 1152 Overgaard, M., & Sandberg, K. (2012). Kinds of access: different methods for report reveal  
1153 different kinds of metacognitive access. *Philosophical Transactions of the Royal Society*  
1154 *of London. Series B, Biological Sciences*, 367(1594), 1287–1296.
- 1155 Peylo, C., Hilla, Y., & Sauseng, P. (2021). Cause or consequence? Alpha oscillations in  
1156 visuospatial attention. *Trends in Neurosciences*, 44(9), 705–713.
- 1157 Pfurtscheller, G., Stancak, A., Jr, & Neuper, C. (1996). Event-related synchronization (ERS)  
1158 in the alpha band—an electrophysiological correlate of cortical idling: a review.  
1159 *International Journal of Psychophysiology: Official Journal of the International*  
1160 *Organization of Psychophysiology*, 24(1-2), 39–46.
- 1161 Pleskac, T. J., & Busemeyer, J. R. (2010). Two-stage dynamic signal detection: a theory of  
1162 choice, decision time, and confidence. *Psychological Review*, 117(3), 864–901.
- 1163 Rahnev, D., Maniscalco, B., Graves, T., Huang, E., de Lange, F. P., & Lau, H. (2011).  
1164 Attention induces conservative subjective biases in visual perception. *Nature*  
1165 *Neuroscience*, 14(12), 1513–1515.
- 1166 Rajagovindan, R., & Ding, M. (2011). From prestimulus alpha oscillation to visual-evoked  
1167 response: an inverted-U function and its attentional modulation. *Journal of Cognitive*  
1168 *Neuroscience*, 23(6), 1379–1394.
- 1169 Ramsøy, T. Z., & Overgaard, M. (2004). Introspection and subliminal perception.  
1170 *Phenomenology and the Cognitive Sciences*, 3(1), 1–23.
- 1171 Rangelov, D., & Mattingley, J. B. (2020). Evidence accumulation during perceptual decision-  
1172 making is sensitive to the dynamics of attentional selection. *NeuroImage*, 117093.
- 1173 Recht, S., de Gardelle, V., & Mamassian, P. (2021). Metacognitive blindness in temporal  
1174 selection during the deployment of spatial attention. *Cognition*, 216, 104864.
- 1175 Recht, S., Mamassian, P., & de Gardelle, V. (2019). Temporal attention causes systematic  
1176 biases in visual confidence. *Scientific Reports*, 9(1), 11622.
- 1177 Ress, D., Backus, B. T., & Heeger, D. J. (2000). Activity in primary visual cortex predicts  
1178 performance in a visual detection task. *Nature Neuroscience*, 3(9), 940–945.
- 1179 Romei, V., Brodbeck, V., Michel, C., Amedi, A., Pascual-Leone, A., & Thut, G. (2008).

- 1180 Spontaneous fluctuations in posterior alpha-band EEG activity reflect variability in  
1181 excitability of human visual areas. *Cerebral Cortex*, 18(9), 2010–2018.
- 1182 Samaha, J., Bauer, P., Cimaroli, S., & Postle, B. R. (2015). Top-down control of the phase of  
1183 alpha-band oscillations as a mechanism for temporal prediction. *Proceedings of the*  
1184 *National Academy of Sciences of the United States of America*, 112(27), 8439–8444.
- 1185 Samaha, J., Iemi, L., Haegens, S., & Busch, N. A. (2020). Spontaneous Brain Oscillations  
1186 and Perceptual Decision-Making. *Trends in Cognitive Sciences*.  
1187 <https://doi.org/10.1016/j.tics.2020.05.004>
- 1188 Samaha, J., Iemi, L., & Postle, B. R. (2017). Prestimulus alpha-band power biases visual  
1189 discrimination confidence, but not accuracy. *Consciousness and Cognition*, 54, 47–55.
- 1190 Sandberg, K., Timmermans, B., Overgaard, M., & Cleeremans, A. (2010). Measuring  
1191 consciousness: is one measure better than the other? *Consciousness and Cognition*,  
1192 19(4), 1069–1078.
- 1193 Sauseng, P., Klimesch, W., Stadler, W., Schabus, M., Doppelmayr, M., Hanslmayr, S.,  
1194 Gruber, W. R., & Birbaumer, N. (2005). A shift of visual spatial attention is selectively  
1195 associated with human EEG alpha activity. *The European Journal of Neuroscience*,  
1196 22(11), 2917–2926.
- 1197 Shekhar, M., & Rahnev, D. (2018). Distinguishing the Roles of Dorsolateral and Anterior  
1198 PFC in Visual Metacognition. *The Journal of Neuroscience: The Official Journal of the*  
1199 *Society for Neuroscience*, 38(22), 5078–5087.
- 1200 Smallwood, J., & Schooler, J. W. (2015). The science of mind wandering: empirically  
1201 navigating the stream of consciousness. *Annual Review of Psychology*, 66, 487–518.
- 1202 Tagliabue, C. F., Veniero, D., Benwell, C. S. Y., Cecere, R., Savazzi, S., & Thut, G. (2019).  
1203 The EEG signature of sensory evidence accumulation during decision formation closely  
1204 tracks subjective perceptual experience. *Scientific Reports*, 9(1), 4949.
- 1205 Thut, G., Nietzel, A., Brandt, S. A., & Pascual-Leone, A. (2006). Alpha-band  
1206 electroencephalographic activity over occipital cortex indexes visuospatial attention bias  
1207 and predicts visual target detection. *The Journal of Neuroscience: The Official Journal*

- 1208 *of the Society for Neuroscience*, 26(37), 9494–9502.
- 1209 Twomey, D. M., Murphy, P. R., Kelly, S. P., & O’Connell, R. G. (2015). The classic P300  
1210 encodes a build-to-threshold decision variable. *The European Journal of Neuroscience*,  
1211 42(1), 1636–1643.
- 1212 van Diepen, R. M., Cohen, M. X., Denys, D., & Mazaheri, A. (2015). Attention and temporal  
1213 expectations modulate power, not phase, of ongoing alpha oscillations. *Journal of*  
1214 *Cognitive Neuroscience*, 27(8), 1573–1586.
- 1215 Van Diepen, R. M., Foxe, J. J., & Mazaheri, A. (2019). The functional role of alpha-band  
1216 activity in attentional processing: the current zeitgeist and future outlook. *Current*  
1217 *Opinion in Psychology*, 29, 229–238.
- 1218 van Dijk, H., Schoffelen, J.-M., Oostenveld, R., & Jensen, O. (2008). Prestimulus oscillatory  
1219 activity in the alpha band predicts visual discrimination ability. *The Journal of*  
1220 *Neuroscience: The Official Journal of the Society for Neuroscience*, 28(8), 1816–1823.
- 1221 VanRullen, R., Busch, N. A., Drewes, J., & Dubois, J. (2011). Ongoing EEG Phase as a  
1222 Trial-by-Trial Predictor of Perceptual and Attentional Variability. *Frontiers in Psychology*,  
1223 2(APR), 1–9.
- 1224 Vickers, D., & Packer, J. (1982). Effects of alternating set for speed or accuracy on response  
1225 time, accuracy and confidence in a unidimensional discrimination task. *Acta*  
1226 *Psychologica*, 50(2), 179–197.
- 1227 Whitmarsh, S., Barendregt, H., Schoffelen, J.-M., & Jensen, O. (2014). Metacognitive  
1228 awareness of covert somatosensory attention corresponds to contralateral alpha power.  
1229 *NeuroImage*, 85 Pt 2, 803–809.
- 1230 Whitmarsh, S., Gitton, C., Jousmäki, V., Sackur, J., & Tallon-Baudry, C. (2021). Neuronal  
1231 correlates of the subjective experience of attention. *The European Journal of*  
1232 *Neuroscience*. <https://doi.org/10.1111/ejn.15395>
- 1233 Whitmarsh, S., Oostenveld, R., Almeida, R., & Lundqvist, D. (2017). Metacognition of  
1234 attention during tactile discrimination. *NeuroImage*, 147, 121–129.
- 1235 Wilimzig, C., Tsuchiya, N., Fahle, M., Einhäuser, W., & Koch, C. (2008). Spatial attention

- 1236 increases performance but not subjective confidence in a discrimination task. *Journal of*  
1237 *Vision*, 8(5), 7.1–10.
- 1238 Worden, M. S., Foxe, J. J., Wang, N., & Simpson, G. V. (2000). Anticipatory Biasing of  
1239 Visuospatial Attention Indexed by Retinotopically Specific  $\alpha$ -Bank  
1240 Electroencephalography Increases over Occipital Cortex. *The Journal of Neuroscience:*  
1241 *The Official Journal of the Society for Neuroscience*, 20(6), RC63–RC63.
- 1242 Yeung, N., & Summerfield, C. (2012). Metacognition in human decision-making: confidence  
1243 and error monitoring. *Philosophical Transactions of the Royal Society of London. Series*  
1244 *B, Biological Sciences*, 367(1594), 1310–1321.
- 1245 Zhang, Y., & Ding, M. (2010). Detection of a weak somatosensory stimulus: role of the  
1246 prestimulus mu rhythm and its top-down modulation. *Journal of Cognitive Neuroscience*,  
1247 22(2), 307–322.
- 1248 Zizlsperger, L., Sauvigny, T., & Haarmeier, T. (2012). Selective attention increases choice  
1249 certainty in human decision making. *PloS One*, 7(7), e41136.
- 1250 Zizlsperger, L., Sauvigny, T., Händel, B., & Haarmeier, T. (2014). Cortical representations of  
1251 confidence in a visual perceptual decision. *Nature Communications*, 5, 3940.
